1 ***Pyrenophora teres* and *Rhynchosporium secalis* infections in malt**  
2 **barley as influenced by genotype, spatial and temporal effects and**  
3 **nitrogen fertilization**

4  
5 **Petros Vahamidis<sup>1\*</sup>, Angeliki Stefopoulou<sup>2</sup>, Christina S. Lagogianni<sup>5</sup>, Garyfalia**  
6 **Economou<sup>1</sup>, Nicholas Dercas<sup>2</sup>, Vassilis Kotoulas<sup>3</sup>, Dionissios Kalivas<sup>4</sup>, Dimitrios**  
7 **I. Tsitsigiannis<sup>5</sup>**

8  
9 <sup>1</sup>Laboratory of Agronomy, Department of Crop Science, Agricultural University of Athens,  
10 Athens, Greece

11 <sup>2</sup>Laboratory of Agricultural Hydraulics, Department of Natural Resources Management &  
12 Agricultural Engineering, Agricultural University of Athens, Athens, Greece

13 <sup>3</sup>Athenian Brewery S.A, Aegaleo, Athens, Greece

14 <sup>4</sup>Laboratory of Soil Science and Agricultural Chemistry, Department of Natural Resources  
15 Management & Agricultural Engineering, Agricultural University of Athens, Athens, Greece

16 <sup>5</sup>Laboratory of Plant Pathology, Department of Crop Science, Agricultural University of  
17 Athens, Athens, Greece

18  
19 \* Corresponding author

20 E-mail: vahamidis@aua.gr

21  
22 **Summary.** Net form net blotch (NFNB) and barley leaf scald are among the most  
23 important barley diseases worldwide and particularly in Greece. Their occurrence in  
24 malt barley can exert a significant negative effect on malt barley grain yield and  
25 quality. An experimental trial across two growing seasons was implemented in Greece  
26 in order i) to assess the epidemiology of NFNB and leaf scald in a barley disease free  
27 area when the initial inoculation of field occurs through infected seeds, and ii) to  
28 further explore the relationship among nitrogen rate, grain yield, quality variables (i.e.  
29 grain protein content and grain size) and disease severity and epidemiology. It was  
30 demonstrated that both NFNB and leaf scald can be carried over from one season to  
31 the next on infected seed under Mediterranean conditions. However, disease severity  
32 was more pronounced after barley tillering phase when soil had been successfully  
33 inoculated first. When nitrogen rate and genotype were the main sources of variation  
34 the epidemiology assessment was implemented with hotspot and Anselin Local  
35 Moran's I analysis. It was found that the location of hotspots was modified during  
36 growing season. Soil and plant variables were assessed for the explanation of this  
37 variability. According to commonality analysis the effect of distance from the

38 locations with the highest disease infections was a better predictor of disease severity  
39 (for both diseases) compared to nitrogen rate during pre-anthesis period. However,  
40 disease severity after anthesis was best explained by nitrogen rate only for the most  
41 susceptible cultivars to NFNB. The effect of disease infections on yield, grain size and  
42 grain protein content varied in relation to genotype, pathogen and stage of crop  
43 development. The importance of crop residues on the evolution of both diseases was  
44 also highlighted.

45

46 **Key words:** malt barley, barley net blotch, barley leaf scald, *Rhynchosporium*,  
47 nitrogen rate, crop residues

48

## 49 **Introduction**

50 Barley (*Hordeum vulgare* L.) is one of the leading cereal crops of the world and it is  
51 clearly number two in Europe in terms of cultivated acreage, next to bread wheat  
52 (*Triticum aestivum* L.) [1]. According to Meussdoerffer and Zarnkow [2], barley is  
53 the major source for brewing malts, which constitute the single most important raw  
54 material for beer production. *Pyrenophora teres* f. *teres* an ascomycete that causes the  
55 foliar disease net form net blotch (NFNB) and *Rhynchosporium secalis*, causal agent  
56 of barley leaf scald are among the most important barley diseases worldwide [3-5]. It  
57 is estimated that both these diseases can decrease barley grain yield up to 30–40% [3,  
58 5-11]. In addition, there are indications that these diseases can also have a negative  
59 effect on malt barley quality [5].

60 Only a few studies have addressed so far the impact of NFNB and leaf scald on malt  
61 barley quality [12-13] , and their results were restricted to northern climates.  
62 However, there is a lack of evidence on what really happens under Mediterranean  
63 conditions where the occurrence of malt barley diseases coincides with terminal  
64 drought. Malt barley has to meet certain specific quality requirements according to  
65 malt industry demands. Grain size and grain protein content are among the most  
66 important quality factors for malting barley [14]. Although the average grain weight  
67 and size is primarily determined during the post-anthesis period [15-16], grain protein  
68 content can also be affected during the pre-anthesis period. For example, pre-anthesis  
69 drought stress can cause a low nitrogen uptake during the vegetative period, thus  
70 reducing the yield potential. Then, more nitrogen is available during grain filling due  
71 to the low number of seeds, and grain protein content is increased [17] .

72 Nitrogen fertilizer rate plays a major role in malt barley by affecting to a great extent  
73 the final yields, grain protein content (that has to be maintained below a threshold of  
74 11.5-12.0% depending on brewing industry), as well as the susceptibility to leaf  
75 diseases. More nitrogen can increase the yield of malt barley [18-21], but can also  
76 exert an adverse effect on quality by increasing grain protein content [14, 22-24]. In  
77 addition, high nitrogen rates can also increase the susceptibility of barley to leaf  
78 diseases [13, 25-28]. Therefore, understanding the relationship among nitrogen rate,  
79 grain yield, quality variables and leaf disease infections can be very useful to further  
80 raising yield and to maintain the quality at a level that meets the requirements of malt  
81 industry.

82 In this study we aimed, i) to estimate the epidemiology of NFNB and leaf scald in a  
83 barley disease free area when the initial inoculation of the field occurs through  
84 infected seeds, and ii) to further explore the relationship among nitrogen rate, grain  
85 yield, quality variables (i.e. grain protein content and grain size) and disease severity  
86 and epidemiology .

87

## 88 **Materials and methods**

### 89 *Study site and experimental design*

90 The experiment was divided into three different phases, namely: a) the selection of  
91 malt barley seeds from infected crops (i.e. NFNB and leaf scald) grown in the main  
92 productive areas of malt barley in Greece (growing season 2013-2014), b) the  
93 inoculation year (Exp 1; growing season 2014-2015) when the seeds from the infected  
94 malt barley cultivars (i.e. *cv. Grace*, *cv. Charles*, *cv. Fortuna*, *cv. KWS Asta* and *cv.*  
95 *Zhana*) were grown in a barley disease free area and c) the application in the same  
96 location (i.e. inoculated soil with infected crop residues from Exp1) of nitrogen  
97 treatments on the most important (in terms of harvested areas) malt barley cultivars in  
98 Greece namely *cv. Zhana*, *cv. Grace*, *cv. Traveler* and *cv. RGT Planet* (Exp 2; growing  
99 season 2015-2016).

100 The experiments (Exp1 and Exp2) were conducted in Spata, Greece (37°58'44.34"N,  
101 23°54'47.87"E and 118 m above sea level), at the experimental station of the  
102 Agricultural University of Athens. The soil was clay loam. Physical and chemical  
103 characteristics of the soil at the beginning of the experiments (November 2013) were:  
104 pH 7.7 (1:1 soil/water extract), organic matter 2.02%, CaCO<sub>3</sub> 27.80%, electrical

105 conductivity ( $E_c$ ) 0.29 mmhos  $\text{cm}^{-1}$ , total N (Kjeldahl) 0.105%, available P (Olsen)  
106 52.84 ppm and 452 ppm exchangeable K.

107 In Exp1 the treatments consisted of 5 five malt barley cultivars as stated above. The  
108 experimental design was a randomized complete block design with 9 replications (in  
109 order to have a better spatial distribution of the selected genotypes) per genotype.  
110 During the second year (Exp2) the experiment was arranged in a two factorial  
111 randomized complete block design with three replications. Treatments were  
112 completely randomized within each block and included four two-rowed malt barley  
113 (*H. vulgare* L.) cultivars (i.e. *cv.* Zhana, *cv.* Grace, *cv.* Traveler and *cv.* RGT Planet)  
114 and four nitrogen fertilization rates. The four N application rates were 0 (N0), 60  
115 (N1), 100 (N2) and 140 (N3)  $\text{kg N ha}^{-1}$ . In order to achieve a more efficient use of the  
116 N, half of it was applied to the experimental plots at the onset of tillering phase (stage  
117 20-22 according to Zadoks et al., 1974 scale) and the remaining at the end of tillering  
118 phase (stage 25-29 according to Zadoks scale [29]) as ammonium nitrate.

119 In both experimental years plot size was 9  $\text{m}^2$  including 15 rows with row space of 20  
120 cm and the crops were planted at a seed rate of approximately 350 seeds  $\text{m}^{-2}$ . The  
121 plots in Exp2 were established in the same location where the plots of Exp1 had been  
122 seeded. In Exp1 sowing was carried out following conventional soil tillage (i.e.  
123 ploughing and then disc cultivator), whereas only rotary cultivator was used in Exp2  
124 in order to simulate conditions of increased soil-borne disease pressure. Only certified  
125 malt barley seeds were used in Exp2, therefore the only source of disease dispersal  
126 was the crop residues from Exp1.

127 Soil water content was frequently determined during each cultivation season. EC-5  
128 sensors of Decagon Devices, Inc. were installed at 25 cm depth in four different plots  
129 for the monitoring of the soil water content (SWC).

130

### 131 *Disease assessment*

132 A slight modification of the equation proposed by Saari and Prescott [30] was adopted  
133 to estimate the disease severity (DS) during the phenological stages of tillering, stem  
134 elongation and milk development:

135

$$136 \quad DS (\%) = (D1/100) \times (D2/9) \times (D3/9) \times 100$$

137

138 Where  $DI$  is the percentage of diseased plants in each plot,  $D2$  is the height of  
139 infection (i.e. 1=lowest leaf; 2=second leaf from base; 3-4=second leaf up to below  
140 middle plant; 5=up to middle of plant; 6-8= from center of plant to below the flag  
141 leaf; 9=up to flag leaf) and  $D3$  is the extent of leaf area affected by disease (i.e.  
142 1=10% coverage to 9 = 90% coverage).

143 The area under disease progress curve (AUDPC) was calculated by following the  
144 formula given by Shaner and Finney [31]:

145

$$146 \quad AUDPC = \sum_{i=1}^{n-1} [(Y_i + Y_{(i+1)})/2] \times (t_{(i+1)} - t_i)$$

147

148 Where,  $Y_i$  = disease level at time  $t_i$  ( $t_{(i+1)} - t_i$ ) is the interval between two consecutive  
149 assessments and  $n$  is the total number of assessments.

150 Barley varieties were naturally infected by both diseases. The pathogens were further  
151 identified in the lab [4].

152

#### 153 *Yield and malt characters measurements*

154 At maturity, grain yield estimation was based on an area of 1 m<sup>2</sup> per plot. Grain size  
155 was determined by size fractionation using a Sortimat (Pfeuffer GmbH, Kitzingen,  
156 Germany) machine, according to the 3.11.1 Analytica EBC “Sieving Test for Barley”  
157 method [32]. Nitrogen content was determined by the Kjeldhal method and protein  
158 content was calculated by multiplying the N content by a factor of 6.25 as described  
159 by Vahamidis et al. [33].

160

#### 161 *Spatial statistical analysis*

162 Using the geographical coordinates of the experimental plots, ArcGIS 10 was used to  
163 explore spatial associations, based on autocorrelation indices, of the disease severity  
164 among the experimental plots during the different developmental stages. Global  
165 autocorrelation indices, like Moran’s I, assess the overall pattern of the data and  
166 sometimes fail to examine pattern at a more local scale [34]. Thus, aiming at  
167 deepening our knowledge on spatial associations, local autocorrelation indices were  
168 used to compare local to global conditions. In this framework, hotspot analysis was  
169 used to identify statistically significant clusters of high values (hot spots) and low

170 values (cold spots) using the Getis-Ord Gi statistic. Anselin Local Moran's I was used  
171 to identify spatial clusters with attribute values similar in magnitude and specify  
172 spatial outliers.

173 In order to further explore the relationship between crop residues and disease severity,  
174 the distance between the crop residues of the previous season (2014/2015) and the  
175 location of the experimental plots of the investigated growing season (2015/2016) was  
176 calculated. At this point, it should be mentioned that Zhana was the only cultivar that  
177 was infected by *Rhynchosporium secalis* and Grace was the cultivar with the highest  
178 infection by *Pyrenophora teres* f. *teres*.

179

### 180 *Hotspot analysis*

181 Moran's I is a popular index to globally assess spatial autocorrelation, however it does  
182 not efficiently recognize the grouping of spatial patterns [35]. Hotspot analysis was  
183 used to assess whether experimental plots with either high or low values cluster  
184 spatially. Hotspot analysis uses the Getis-Ord local statistic given as:

$$185 \quad G_i^* = \frac{\sum_{j=1}^n w_{ij}x_j - \bar{X} \sum_{j=1}^n w_{ij}}{S \sqrt{\frac{n \sum_{j=1}^n w_{ij}^2 - \left(\sum_{j=1}^n w_{ij}\right)^2}{n-1}}}$$

186

187 Where  $x_j$  is the disease severity value for experimental plot  $j$ ,  $w_{ij}$  is the spatial weight  
188 between experimental plot  $i$  and  $j$ ,  $n$  is the total number of experimental plots and

189

$$190 \quad \bar{X} = \frac{\sum_{j=1}^n x_j}{n}$$
$$191 \quad S = \sqrt{\frac{\sum_{j=1}^n x_j^2}{n} - (\bar{X})^2}$$

192

193 The Getis -Ord  $G_i$  statistic assesses whether the neighborhood of each experimental  
194 plot is significantly different from the study area and can distinguish high values  
195 clusters (hot spots) and low values clusters (cold spots).

196 The  $G_i^*$  statistic returns a z-score which is a standard deviation. For statistically  
197 significant positive z-scores, higher values of z-score indicate clustering of high  
198 values (hot spot). For statistically significant negative z-scores, lower values indicate  
199 clustering of low values (cold spot).

200

### 201 *Cluster and outlier analysis*

202 Anselin Local Moran's I was used to identify clusters and spatial outliers. The index  
203 identifies statistically significant (95%,  $p < 0.05$ ) clusters of high or low disease  
204 severity and outliers. A high positive local Moran's I value implies that the  
205 experimental plot under study has similarly high or low values as its neighbors, thus  
206 the locations are spatial clusters. Spatial clusters include high-high clusters (high  
207 values in a high value neighborhood) and low-low clusters (low values in a low value  
208 neighborhood). A high negative local Moran's I value means that the experimental  
209 plot under study is a spatial outlier [36]. Spatial outliers are those values that are  
210 obviously different from the values of their surrounding locations [37]. Anselin Local  
211 Moran's I enables us to distinguish outliers within hot spots, because it excludes the  
212 value of the experimental plot under study, in contrary to the hotspot analysis, which  
213 takes it into account.

214 Local Moran's I is given as:

215

$$216 \quad I_i = \frac{x_i - \bar{X}}{S_i^2} \sum_{j=1, j \neq i}^n w_{ij}(x_j - \bar{X})$$

217

218 Where  $x_i$  is an attribute for feature I,  $\bar{X}$  is the mean of the corresponding attribute,  $w_{i,j}$   
219 is the spatial weight between feature I and j, and:

220

$$221 \quad S_i^2 = \frac{\sum_{j=1, j \neq i}^n w_{ij}}{n-1} - \bar{X}^2$$

222



223 *Statistical analysis*

224 Analyses of variance was performed using Statgraphics Centurion ver. XVI software  
225 package (Statpoint Technologies, Inc.,USA, Warrenton, Virginia). The experiment  
226 was a  $2 \times 4$  factorial, replicated three times in a randomized complete block design.  
227 Significant differences between treatment means were compared by the protected  
228 least significant difference (LSD) procedure at  $P < 0.05$ . Commonality analysis was  
229 performed in the R Environment (version 3.4.3) using the ‘yhat’ package (version 2.0-  
230 0) as described by Nimon et al. [38].

231

232 **Results**

233 *Weather conditions*

234 The weather regime, in terms of maximum ( $T_{max}$ ) and minimum air temperature  
235 ( $T_{min}$ ) and rainfall, during both experiments is presented in Fig 1. The maximum and  
236 minimum temperatures increased from February to May, as typically occurs in  
237 Mediterranean environments. Environmental conditions differed between the two  
238 experimental years, with differences in the amount and distribution of precipitation  
239 during the growing season, as well as in temperature. In general 2015-2016 (Exp2)  
240 was considered to be a dryer growing season compared to 2014-2015 (Exp1).

241 **Fig 1.** Precipitation and air temperature ( $T_{min}$  and  $T_{max}$ ) during Exp1 (A, 2014-  
242 2015) and Exp2 (B, 2015-2016). The arrows indicate the main phenological stages:  
243 S=sowing; A=Anthesis.

244

245

246 *Temporal and genotypic effects*

247 Charles, Grace, Traveler, Fortuna, KWS Asta and RGT Planet were exclusively  
248 infected with *Pyrenophora teres f. teres* (net form net blotch - NFNB), whereas the  
249 cultivar Zhana was exclusively infected with *Rhynchosporium secalis* (leaf scald).  
250 NFNB occurred at all developmental stages and in both experiments, whereas leaf  
251 scald was consistently observed after the onset of stem elongation phase (Fig 2).  
252 Although disease severity tended to be higher in Exp1 (disease dispersal from infected  
253 barley seed) compared to Exp2 (diseases dispersal from infected barley debris left  
254 after harvest) during the tillering phase of malt barley, after the onset of stem  
255 elongation stage it was more pronounced in Exp2. The same trend was also observed



256 with leaf scald. In general, infections by NFNB were more severe compared to those  
 257 by leaf scald, during all tested developmental phases of malt barley (Fig 2).

258

259 **Fig 2.** Malt barley cultivars susceptibility to *Pyrenophora teres f. teres* (net form net  
 260 blotch - NFNB) and *Rhynchosporium secalis* (leaf blotch, scald) at different  
 261 developmental phases during both experiments. The numbers in the brackets refer to  
 262 Zadoks scale. Broad lines are medians, square open dots are means, boxes show the  
 263 interquartile range and whiskers extend to the last data point within 1.5 times the  
 264 inter-quartile range. *P*-values of ANOVA and permutation tests are given. Groups not  
 265 sharing the same letter are significantly different according to L.S.D. test ( $p < 0.05$ ).

266

267

268 *Effect of N and genotype on grain yield and quality characters*

269 Although the experimental data demonstrated a tendency for a positive relationship  
 270 between the disease severity during grain filling and the rate of applied nitrogen (Fig  
 271 4), this tendency was not expressed in a statistical significant way according to  
 272 ANOVA (Table 1). The only variable that was significantly affected by the rate of  
 273 applied nitrogen was grain protein content (Table 1). With the exception of Zhana (i.e.  
 274 it was the only cultivar that was infected with *Rhynchosporium secalis*) an increased  
 275 disease severity generally resulted in higher grain protein content. However, it was  
 276 recorded a genotypic variation among the studied cultivars concerning their response  
 277 to increased disease severity (Fig 5).

278 **Fig 4.** The effect of nitrogen rate on disease severity (caused by *Pyrenophora teres f.*  
 279 *teres* and *Rhynchosporium secalis*) assessed at different developmental stages of malt  
 280 barley. Broad lines are medians, square open dots are means, boxes show the  
 281 interquartile range and whiskers extend to the last data point within 1.5 times the  
 282 inter-quartile range. *P*-values of ANOVA and permutation tests are given.

283

284 **Fig 5.** Relationship among disease severity (caused by *Pyrenophora teres f. teres* and  
 285 *Rhynchosporium secalis*) with grain protein content and maltable grain size fraction  
 286 (>2.2 mm) at grain filling phase when the main source of variation is nitrogen rate.  
 287 \*At  $P \leq 0.05$ ; \*\*At  $P \leq 0.01$ ; \*\*\*At  $P \leq 0.001$ ; ns=non-significant.

288

**Table 1.** ANOVA summary for grain yield, grain protein content, maltable (% grains > 2.2 mm), AUDPC and disease severity (DS) during the onset of stem elongation and grain filling phases

| Source of variation | Grain yield (kg/ha) | Grain protein content (%) | Maltable (%) | AUDPC <sup>a</sup> | DS (stem elongation) | DS (grain filling) |
|---------------------|---------------------|---------------------------|--------------|--------------------|----------------------|--------------------|
| Cultivar            | **                  | ns                        | ***          | **                 | *                    | *                  |
| Nitrogen            | ns                  | ***                       | ns           | ns                 | ns                   | ns                 |
| Cultivar x Nitrogen | *                   | ns                        | ns           | ns                 | ns                   | ns                 |

\*. \*\*.\*\*\* F values significant at the  $P < 0.05$ .  $P < 0.01$  and  $P < 0.001$  probability levels, respectively.

ns stands for non-significant effect.

<sup>a</sup>AUDPC: Area under disease progress curve.

289

290 Grain yield was significantly affected by cultivar and by the interaction cultivar x  
291 nitrogen (Table 1), and varied from 0.84 to 4.26 t ha<sup>-1</sup>. Grace and Traveler were the  
292 only cultivars that presented significant relationships between grain yield and disease  
293 severity (Fig 6). In particular, Traveler recorded a marginal statistically significant  
294 negative relationship between grain yield and disease severity, only for the period of  
295 tillering (Fig 6). Concerning Grace, grain yield showed a negative significant direct  
296 relationship to disease severity for the period of grain filling (milk development) and  
297 on the contrary, presented a moderate positive association to disease severity for the  
298 period of tillering phase (Fig 6).

299 **Fig 6.** Relationship between grain yield and disease severity (caused by *Pyrenophora*  
300 *teres f. teres* and *Rhynchosporium secalis*) assessed at different developmental stages  
301 of malt barley, when the main source of variation is nitrogen rate. The numbers in the  
302 brackets refer to Zadoks scale. \*At  $P \leq 0.05$ ; \*\*At  $P \leq 0.01$ ; \*\*\*At  $P \leq 0.001$ ; ns=non-  
303 significant.

304

305 The proportion of maltable grain size fraction (% grains > 2.2 mm), as well as disease  
306 severity during stem elongation and grain filling phases were not significantly  
307 affected by the rate of applied nitrogen (Table 1). A negative, but not significant,  
308 association was recorded between the proportion of maltable grain size fraction and  
309 disease severity for all the studied cultivars (Fig 5).

310

311 *The area under disease progress curve (AUDPC)*

312 The area under disease progress curve (AUDPC) in Exp2 was not significantly  
313 affected either by nitrogen rate or the interaction cultivar x nitrogen (Table 1).  
314 However, the analysis of variance for AUDPC indicated that a significant degree of  
315 genotypic variation existed among the studied malt barley cultivars in both  
316 experiments. The AUDPC values were lower in Exp1 compared to Exp2. Charles and  
317 Grace presented the highest values in Exp1 and Exp2, respectively (Fig 3).

318

319 **Fig 3.** Malt barley cultivars susceptibility to *Pyrenophora teres f. teres* (net form net  
320 blotch - NFNB) and *Rhynchosporium secalis* (leaf blotch, scald) based on the area  
321 under disease progress curve (AUDPC). Broad lines are medians, square open dots  
322 are means, boxes show the interquartile range and whiskers extend to the last data  
323 point within 1.5 times the inter-quartile range. P-values of ANOVA and permutation  
324 tests are given. Groups not sharing the same letter are significantly different according  
325 to L.S.D. test ( $p < 0.05$ ).

326

327

328 *Epidemiology assessment when nitrogen rate and genotype are the main sources of*  
329 *variation*

330 Distribution patterns of disease severity were analyzed by using hotspot and cluster  
331 and outlier analysis in ArcGIS 10x for three different crop developmental periods: 1)  
332 tillering (20-21Z), 2) stem elongation (30-31Z) and 3) milk development (71-73Z).  
333 Cluster and outlier analysis was used to identify clusters of disease infected areas in  
334 cluster types of HH, HL, LL, and LH. LH represents a cluster of low values  
335 surrounded by high values, while HL is a cluster of high values surrounded by low  
336 values. In addition, LL and HH were statistically significant ( $p < 0.05$ ) clusters of low  
337 and high disease severity values, respectively.

338 During the onset of tillering phase, two experimental plots presented significant  
339 positive z scores demonstrating significant clusters of intense disease severity. They  
340 were located on the western part of the field and both of them included Traveler with  
341 nitrogen rate of 100 and 140 kg/ha, respectively (Fig 7). A further investigation  
342 revealed that the distance of Traveler experimental plots from the previous season  
343 crop residues (i.e. the sites with Grace) explained 34% of the variation in disease  
344 severity (Fig 8). RGT Planet with nitrogen rate of 100 kg/ha, was also marked as a  
345 hotspot, but less intense since it presents a lower z score (Fig 7). It is reminded that  
346 lower z-scores indicate less intense clustering. The Local Moran's I spatial analysis,  
347 indicated only one High-Low outlier in the western part of the field. Indeed, Traveler  
348 with a rate of 100 kg N /ha was considered as an outlier since it presented high values  
349 of disease severity surrounded by lower surrounding values.

350 **Fig 7.** Composite hotspot analysis (Gi z-score) and cluster pattern analysis (Local  
351 Moran's I) of disease severity (caused by *Pyrenophora teres f. teres* and  
352 *Rhynchosporium secalis*) assessed at different developmental stages of malt barley. A  
353 georeferenced arrangement of the experimental area showing the distribution of the  
354 cultivar and N-fertilizer treatments is also presented. The abbreviations stand for:  
355 Gr=Grace; Zh=Zhana; Tr=Traveler; Pl=Planet.

356

357 **Fig 8.** Relationship between disease severity and the distance of Zhana plots from the  
358 previous season Zhana's crop. \*At  $P \leq 0.05$ ; \*\*At  $P \leq 0.01$ ; \*\*\*At  $P \leq 0.001$ ; ns=non-  
359 significant.

360

361 During the stem elongation phase, hotspots increased in number and continued to be  
362 present in the western part of the field. The analysis identified three hotspots with  
363 very high z scores (Grace with 60 kg N /ha; Traveler with 100 kg N /ha; Traveler with

364 140 kg N /ha, one with high (RGT Planet with 0 kg N /ha) and one with moderate z  
365 score (Grace with 60 kg N /ha). Although Zhana with 60 and 100 kg N /ha was  
366 surrounded by hot spots, presented low values of disease severity. The Local Moran's  
367 I spatial analysis, confirmed the abovementioned results by characterizing these plots  
368 as Low-High outliers, indicating low values of disease severity compared to the  
369 surrounding plots. The analysis also identified a statistical significant ( $p < 0.05$ ) cluster  
370 of increased disease severity, which coincided with two of the hotspots (Traveller and  
371 Planet in the western side) determined with Getis-Ord  $G^*$  statistic (Fig 7).

372 Two Grace plots with 140 kg N /ha were identified as hot spots of highest z scores  
373 during milk development and followed by RGT Planet without nitrogen application.  
374 The Local Moran's I spatial analysis again identified two Zhana plots (i.e. nitrogen  
375 rate 0 and 100 kg/ha) as spatial outliers, since they presented low disease severity in a  
376 neighborhood of high values (Fig 7).

377

378 *Quantifying the effect of the rate of applied nitrogen and the distance from the nearest*  
379 *hotspot on crop disease severity*

380 Commonality analysis (CA) served to quantify the relative contribution of the rate of  
381 applied nitrogen (kg/ha) and the distance from the nearest hotspot on crop disease  
382 severity. It is a method of partitioning variance which can discriminate the synergistic  
383 or antagonistic processes operating among predictors. Commonalities represent the  
384 percentage of variance in the dependent variable that is uniquely explained by each  
385 predictor (Unique effect) or by all possible combinations of predictors (Common  
386 effect) and their sum is always equal to  $R^2$  of the multiple linear regression. The  
387 distance from the nearest hotspot (m) and the quantity of applied nitrogen (kg/ha)  
388 explained from 10 to 74% of the variance in disease severity (Table 2). Examining the  
389 unique effects, it was found, that for the period of stem elongation phase, the distance  
390 from the nearest hotspot (m) was the best predictor of disease severity for all the study  
391 cultivars, uniquely explaining from 16.8 to 45.5 of its variation. This amount of  
392 variance represented from 38.76 to 97.65% of the  $R^2$  effect (Table 2). On the contrary,  
393 during the onset of grain filling phase the variation in disease severity was best  
394 explained by either the nitrogen rate (i.e. Traveler and Grace) or the distance from the  
395 nearest hotspot (m) (i.e. RGT Planet and Zhana) (Table 2).

396

397

398  
399  
400  
401  
402  
403

**Table 2.** Commonality coefficients including both unique and common effects, along with % total contribution of each predictor variable or sets of predictor variables to the regression effect.

| Cultivar   | Unique and Common Effects        | Onset of stem elongation |         | Onset of grain filling (milk development) |         |
|------------|----------------------------------|--------------------------|---------|-------------------------------------------|---------|
|            |                                  | Coefficient              | % Total | Coefficient                               | % Total |
| Traveler   | Unique to Distance <sup>a</sup>  | 0.4547                   | 72.51   | 0.0008                                    | 0.22    |
|            | Unique to Nitrogen <sup>b</sup>  | 0.0004                   | 0.07    | 0.3493                                    | 93.17   |
|            | Common to Distance, and Nitrogen | 0.1720                   | 27.42   | 0.0248                                    | 6.61    |
|            | Total                            | 0.6271                   | 100.00  | 0.3748                                    | 100.00  |
| Zhana      | Unique to Distance               | 0.1678                   | 67.81   | 0.0819                                    | 79.91   |
|            | Unique to Nitrogen               | 0.0089                   | 3.59    | 0.0241                                    | 23.51   |
|            | Common to Distance, and Nitrogen | 0.0708                   | 28.61   | -0.0035                                   | -3.42   |
|            | Total                            | 0.2475                   | 100.00  | 0.1025                                    | 100.00  |
| Grace      | Unique to Distance               | 0.3837                   | 97.65   | 0.1641                                    | 22.26   |
|            | Unique to Nitrogen               | 0.0105                   | 2.66    | 0.2850                                    | 38.66   |
|            | Common to Distance, and Nitrogen | -0.0012                  | -0.31   | 0.2881                                    | 39.08   |
|            | Total                            | 0.3930                   | 100.00  | 0.7373                                    | 100.00  |
| RGT Planet | Unique to Distance               | 0.1912                   | 38.76   | 0.3672                                    | 83.26   |
|            | Unique to Nitrogen               | 0.0925                   | 18.75   | 0.0020                                    | 0.46    |
|            | Common to Distance, and Nitrogen | 0.2096                   | 42.49   | 0.0718                                    | 16.29   |
|            | Total                            | 0.4933                   | 100.00  | 0.4411                                    | 100.00  |

<sup>a</sup>Refers to the distance from the nearest hotspot (m)

<sup>b</sup>Refers to the rate of applied nitrogen (kg/ha)

404

## 405 Discussion

406 Our results demonstrated that both NFNB and leaf scald can be carried over from one  
407 season to the next on infected seed under Mediterranean conditions, which is in line  
408 with previous reports [3, 39]. Typical yield losses due to NFNB (*Pyrenophora teres f.*  
409 *teres*) and leaf scald (*Rhynchosporium secalis*) outbreaks can be up to 30–40% [3, 6,  
410 8-11]. However, we did not detect any consistent relationship between disease  
411 severity and grain yield when the main source of variation was nitrogen rate (Fig 6).  
412 Jalakas et al. [40] also found a weak relationship between malt barley grain yield and  
413 net blotch (*Pyrenophora teres*) disease severity. This can be attributed to the time of  
414 disease occurrence and the extent of disease severity in relation to barley  
415 developmental stage. It is widely accepted that grain yield determination in barley is

416 mainly explained by the variation of grain number per unit of land area [20, 33, 41-  
417 42]. According to Bingham et al. [43], grain number in barley is a function of the  
418 production and survival of tillers and spikelets and the success of fertilization of  
419 florets. Tiller production and spikelet initiation occur before stem elongation phase,  
420 while the survival and further growth of tillers and spikelets is largely determined  
421 from stem elongation onwards. Accordingly, our results showed that the highest  
422 disease severity, which was recorded in Traveler during tillering phase (Fig 2),  
423 exerted a more pronounced negative effect on grain yield (Fig 6). In addition, the  
424 higher disease severity in Grace compared to the rest of the studied cultivars during  
425 the onset of grain filling phase (Fig 2), led to a significant reduction in grain yield,  
426 mainly through a decrease in mean grain weight. Indeed, an increase in disease  
427 severity by 32.5% during grain filling phase caused a reduction in thousand grain  
428 weight by 18.3% in Grace. In line with this, Agostinetto et al. [44] demonstrated that  
429 the strongest relationship between grain yield reduction and barley spot blotch  
430 severity occurred after the booting stage of barley. Furthermore, Khan [9] observed a  
431 reduction in barley grain yield by 25-35% from net blotch, mainly due to a significant  
432 decrease in thousand grain weight.

433 The effect of N on plant disease severity is quite variable in literature [27]. Both  
434 increases [13, 25, 28] and decreases [26] of disease severity are reported by increasing  
435 N in plants. In addition, Turkington et al. [12] found that total leaf disease severity,  
436 caused by NFNB, in barley was not significantly affected by N rate. Our results  
437 showed that disease severity for both pathogens tended to increase from anthesis  
438 onwards by increasing the rate of applied nitrogen (Fig 4). This relationship can be  
439 attributed to some extent to the synergistic effect of the N fertilizer type used in this  
440 study. It is suggested that nitrate fertilizers increase the severity of disease whereas  
441 ammonium fertilizers decrease it [28 and references quoted therein].

442 Grain protein content is one of the most important factors in marketing malting  
443 barley. The primary objective, particularly in Mediterranean environments, is to  
444 maintain grain protein content below a threshold of 11.5-12.0% depending on  
445 brewing industry [33]. Although there is some evidence from northern climates  
446 suggesting that NFNB infections are not exerting any significant effect on grain  
447 protein content [12-13], our results revealed for the first time a positive relationship  
448 between NFNB disease severity and grain protein content under Mediterranean  
449 conditions. Additionally, it was shown that the magnitude of this relationship was



450 genotype dependent (Fig 5). It seems that the effect of NFNB disease severity on  
451 grain protein content increases under terminal drought stress conditions in April-May  
452 (Figs 1A and 1B). According to Bertholdsson [17] drought stress during late grain  
453 filling, limits carbohydrate incorporation in the grain and causes pre-maturation and  
454 less dilution of the protein in the grain.

455 The epidemiology assessment of both diseases, when nitrogen rate and genotype were  
456 the main sources of variation, was implemented with hotspot and Anselin Local  
457 Moran's I analysis. The location of hotspots was modified during the growing season  
458 (Fig 7). This can be explained either by the soil heterogeneity or by the spatial  
459 presence of the pathogens in the soil (i.e. as infected host residue) and genotype  
460 susceptibility. The soil heterogeneity was considered negligible because: i) the  
461 acreage of the experimental field was small (approximately 0.1 ha), ii) there was no  
462 land inclination and iii) the differentiation of the field soil moisture was rather small  
463 (Fig 9).

464

465 **Fig 9.** The variation in soil water content from anthesis until the end of grain filling  
466 (during Exp2). Broad lines are medians, square open dots are means, boxes show the  
467 interquartile range and whiskers extend to the last data point within 1.5 times the  
468 inter-quartile range.

469

470 Commonality analysis, when nitrogen rate and genotype were the main sources of  
471 variation, revealed that the most important factor concerning NFNB disease severity  
472 was the distance of plots from the hotspots, concerning the period of onset of stem  
473 elongation (Table 2). According to Liu et al. [4], NFNB is classified as stubble-borne  
474 disease because the fungus usually produces the ascocarp as an over-seasoning  
475 structure on infected barley debris left after harvest. The primary inoculum early in  
476 the growing season is made by mature ascospores which are dispersed by wind. After  
477 initial colonization, the pathogen produces a large number of conidia which serve as  
478 secondary inocula. These asexually produced spores can be dispersed either by wind  
479 or rain to cause new infections on plants locally or at longer distances [4 and  
480 references quoted therein].

481 On the other hand, Zhana was the only cultivar which was not infected by NFNB  
482 during neither seasons (i.e. it was infected only by *Rhynchosporium secalis*).  
483 However, it was found that the distance of Zhana experimental plots from the  
484 previous season crop residues (i.e. the sites with Zhana) explained 51% of the



485 variation in disease severity (Fig 8). This result is also supported by the Anselin Local  
486 Moran's I spatial statistical analysis. Zhana was considered an outlier due to lower  
487 disease severity values although surrounded by plots with high values from stem  
488 elongation onwards (Fig 7).

489 The late occurrence of *Rhynchosporium secalis* symptoms on Zhana compared to  
490 NFNB (Fig 2) during both experiments, can be possibly attributed to its specific life  
491 cycle. According to Zhan et al. [3] *R. secalis* grows symptomlessly under the cuticle,  
492 especially where walls of adjacent cells are joined before producing new conidia and  
493 finally, visual symptoms. Further investigations concerning the infection process of *R.*  
494 *secalis* in barley had been conducted by Linsell et al. [45].

495 In general, NFNB was more prevalent compared to leaf scald during all tested  
496 developmental phases of malt barley (Figs 2 and 3). According to Robinson and Jalli  
497 [46] this could be a result of net blotch being comparatively less demanding of  
498 environmental conditions (mostly wind dispersed) than scald (mostly splash  
499 dispersed) for effective spore dispersal and epidemic development.

500

## 501 **Conclusions**

502 The results of the present study provide a further insight into the epidemiology and  
503 the effect of nitrogen fertilization on the most important foliar diseases of malt barley  
504 in Greece. It was demonstrated that both NFNB and leaf scald can be carried over  
505 from one season to the next on infected seed under Mediterranean conditions.  
506 However, disease severity was more pronounced after barley tillering phase when soil  
507 had been successfully enriched first with the pathogen propagules. When both plant  
508 pathogens were present in soil residues, it was shown that the effect of the distance of  
509 cultivars from hotspots (i.e. the locations with the highest disease infections) was a  
510 better predictor of disease severity (for both diseases) compared to nitrogen rate  
511 during the pre-anthesis period. However, after anthesis disease severity was best  
512 explained by nitrogen rate concerning the most susceptible cultivars to NFNB. In  
513 addition, it was presented that the effect of disease infections on yield, grain size and  
514 grain protein content varied in relation to genotype, pathogen and the stage of crop  
515 development.

516

## 517 **Acknowledgements**

518 The present study was funded by the Athenian Brewery SA through the project  
519 “Evaluation of macro and micro barley trials of Athenian Brewery SA”.

520

## 521 **References**

- 522 1. Friedt W. Barley breeding history, progress, objectives, and technology. In: Barley  
523 production, improvement, and uses. Ullrich, S.E. (ed), Wiley-Blackwell. 2011;  
524 pp. 160-220
- 525 2. Meussdoerffer F. and Zarnkow M. Starchy Raw Materials. In: Handbook of  
526 brewing: processes, technology, markets. Eßlinger, H.M. (ed), Wiley-VCH  
527 Verlag GmbH & Co. KGaA, Weinheim. 2009; pp. 43-83
- 528 3. Zhan J, Fitt BDL, Pinnschmidt HO, Oxley SJP, Newton AC. Resistance,  
529 epidemiology and sustainable management of *Rhynchosporium secalis*  
530 populations on barley. *Plant Pathol.* 2008; 57, 1–14.
- 531 4. Liu Z, Ellwood SR, Oliver RP, Friesen TL. *Pyrenophora teres*: profile of an  
532 increasingly damaging barley pathogen. *Mol Plant Pathol.* 2011; 12, 1–19.
- 533 5. Paulitz TC and Steffenson BJ. Biotic stress in barley: Disease problems and  
534 solutions. In: Barley production, improvement, and uses. Ullrich, S.E. (ed),  
535 Wiley-Blackwell. 2011. pp. 307-354
- 536 6. Shipton WA. Effect of net blotch infection of barley on grain yield and quality.  
537 *Austral J Exp Agr and Animal Hus.* 1966; 6: 437 – 440.
- 538 7. Shipton WA, Boyd WJR and Ali SM. Scald of barley. *Reviews in Plant*  
539 *Pathology* 1974; 53: 839 – 861.
- 540 8. Martin RA. Disease progression and yield loss in barley associated with net blotch,  
541 as influenced by fungicide seed treatment. *Can J Plant Pathol* 1985; 7: 83-90.
- 542 9. Khan TN. Relationship between net blotch (*Drechslera teres*) and losses in grain  
543 yield of barley in Western Australia. *Aust J Agr Res.* 1987; 38: 671-679.
- 544 10. El Yousfi B. and Ezzahiri B. Net blotch in semi-arid regions of Morocco II: Yield  
545 and yield-loss modeling. *Field Crop Res.* 2002; 73: 81–93.
- 546 11. Murray GM. and Brennan JP. Estimating disease losses to the Australian barley  
547 industry. *Australas Plant Path.* 2010; 39: 85–96.
- 548 12. Turkington TK, O’Donovan JT, Edney MJ, Juskiw PE, McKenzie RH, Harker  
549 KN, et al. Effect of crop residue, nitrogen rate and fungicide application on  
550 malting barley productivity, quality, and foliar disease severity. *Can J Plant Sci.*  
551 2012; 92: 577-588.

- 552 13. Kangor T, Sooväli P, Tamm Y, Tamm I and Koppel M. Malting barley diseases,  
553 yield and quality - responses to using various agro-technology regimes. Proc  
554 Latvian Academy of Sciences. Section B, Vol. 71 No. 1/2 (706/707). 2017. pp.  
555 57–62.
- 556 14. Grashoff, C and D’Antuono LF. Effect of shading and nitrogen application on  
557 yield, grain size distribution and concentrations of nitrogen and water soluble  
558 carbohydrates in malting spring barley (*Hordeum vulgare* L.). *Eur J Agron.*  
559 1997; 6: 275–293.
- 560 15. Bingham IJ, Blake J, Foulkes MJ and Spink J. Is barley yield in the UK sink  
561 limited? II. Factors affecting potential grain size. *Field Crop Res.* 2007; 101:  
562 212–220.
- 563 16. Ugarte C, Calderini DF and Slafer GA. Grain weight and grain number  
564 responsiveness to pre-anthesis temperature in wheat barley and triticale. *Field*  
565 *Crop Res.* 2007; 100: 240–248.
- 566 17. Bertholdsson, NO. Characterization of malting barley cultivars with more or less  
567 stable grain protein content under varying environmental conditions. *Eur J*  
568 *Agron.* 1999; 10: 1–8.
- 569 18. Baethgen WE, Christianson CB and Lamothe AG. Nitrogen fertilizer effects on  
570 growth, grain yield, and yield components of malting barley. *Field Crop Res.*  
571 1995; 43: 87-99.
- 572 19. Abeledo LG, Calderini DF and Slafer GA. Nitrogen economy in old and modern  
573 malting barleys. *Field Crop Res.* 2008; 106: 171–178.
- 574 20. Albrizio R, Todorovic M, Matic T and Stellacci AM, Comparing the interactive  
575 effects of water and nitrogen on durum wheat and barley grown in a  
576 Mediterranean environment. *Field Crop Res.* 2010; 115: 179–190.
- 577 21. Dordas C. Variation in dry matter and nitrogen accumulation and remobilization  
578 in barley as affected by fertilization, cultivar, and source–sink relations. *Eur J*  
579 *Agron.* 2012; 37: 31– 42.
- 580 22. Grant CA, Gauer LE, Gehl DT, and Bailey LD. Protein production and nitrogen  
581 utilization by barley cultivars in response to nitrogen fertilizer under varying  
582 moisture conditions. *Can J Plant Sci.* 1991; 71: 997-1009.
- 583 23. Boonchoo S, Fukai S and Hetherington SE. Barley yield and grain protein  
584 concentration as affected by assimilate and nitrogen availability. *Aust J Agr*  
585 *Res.* 1998; 49: 695-706.

- 586 24. Agegnehu G, Nelson PN and Bird MI. The effects of biochar, compost and their  
587 mixture and nitrogen fertilizer on yield and nitrogen use efficiency of barley  
588 grown on a Nitisol in the highlands of Ethiopia. *Sci Total Environ.* 2016; 869–  
589 879
- 590 25. Jenkyn JF and Griffiths E. Relationships between the severity of leaf blotch  
591 (*Rhynchosporium secalis*) and the water-soluble carbohydrate and nitrogen  
592 contents of barley plants. *Ann Appl Biol.* 1978; 90: 35-44.
- 593 26. Krupinsky JM, Halvorson AD, Tanaka DL and Merrill SD. Nitrogen and tillage  
594 effects on wheat leaf spot diseases in the northern great plains. *Agron J.* 2007;  
595 99: 562–569.
- 596 27. Dordas C. Role of nutrients in controlling plant diseases in sustainable agriculture.  
597 A review. *Agron Sustain Dev.* 2008; 28: 33–46.
- 598 28. Veresoglou SD, Barto EK, Menexes G and Rillig MC. Fertilization affects  
599 severity of disease caused by fungal plant pathogens. *Plant Pathol.* 2013; 62:  
600 961–969.
- 601 29. Zadoks JC, Chang TT and Konzak CF. A decimal code for the growth stages of  
602 cereals. *Weed Res.* 1974; 14: 415-421.
- 603 30. Saari EE and Prescott JM. Scale for appraising the foliar intensity of wheat  
604 diseases. *Plant Dis Rep.* 1975; 59: 377-380.
- 605 31. Shaner G and Finney R. The effect of nitrogen fertilization on the expression of  
606 slow-mildewing resistance in knox wheat. *Phytopathology.* 1977; 67: 1051–  
607 1056.
- 608 32. Analytica EBC. Sieving Test for Barley Method 3.11. 1998.
- 609 33. Vahamidis P, Stefopoulou A, Kotoulas V, Lyra D, Dercas N and Economou G,  
610 Yield, grain size, protein content and water use efficiency of null-LOX malt  
611 barley in a semiarid Mediterranean agroecosystem. *Field Crop Res.* 2017; 206;  
612 115–127.
- 613 34. Getis, A and Ord JK. The analysis of spatial association by use of distance  
614 statistics. *Geogr Anal.* 1992; 24: 189-206.
- 615 35. Zhang H and Tripathi NK. Geospatial hot spot analysis of lung cancer patients  
616 correlated to fine particulate matter (PM<sub>2.5</sub>) and industrial wind in Eastern  
617 Thailand. *J Clean Prod.* 2018; 170: 407-424.

- 618 36. Zhang C, Luo L, Xu W and Ledwith V. Use of local Moran's I and GIS to identify  
619 pollution hotspots of Pb in urban soils of Galway, Ireland. *Sci Total Environ.*  
620 2008; 398: 212-221.
- 621 37. Lalor GC and Zhang C. Multivariate outlier detection and remediation in  
622 geochemical databases. *Sci Total Environ.* 2001; 281: 99–109.
- 623 38. Nimon K, Lewis M, Kane R and Haynes RM. An R package to compute  
624 commonality coefficients in the multiple regression case: An introduction to the  
625 package and a practical example. *Behav ResMethods.* 2008; 40: 457-466.
- 626 39. McLean MS, Howlett BJ and Hollaway GJ. Epidemiology and control of spot  
627 form of net blotch (*Pyrenophora teres f. maculata*) of barley: a review. *Crop*  
628 *Pasture Sci.* 2009; 60: 303–315.
- 629 40. Jalakas P, Tulva I, Kangor T, Sooväli P, Rasulov B, Tamm Ü et al. Gas exchange-  
630 yield relationships of malting barley genotypes treated with fungicides and  
631 biostimulants. *Eur J Agron.* 2018; 99: 129–137.
- 632 41. Cossani CM, Savin R and Slafer GA. Contrasting performance of barley and  
633 wheat in a wide range of conditions in Mediterranean Catalonia (Spain). *Ann*  
634 *Appl Biol.* 2007; 151: 167–173.
- 635 42. Cossani CM, Slafer GA and Savin R. Yield and biomass in wheat and barley  
636 under a range of conditions in a Mediterranean site. *Field Crop Res.* 2009; 112:  
637 205–213.
- 638 43. Bingham IJ, Hoad SP, Thomas WTB and Newton AC. Yield response to  
639 fungicide of spring barley genotypes differing in disease susceptibility and  
640 canopy structure. *Field Crop Res.* 2012; 139: 9–19.
- 641 44. Agostinetto L, Casa RT, Bogo A, Sachs C, Souza CA, Reis EM et al. Barley spot  
642 blotch intensity, damage, and control response to foliar fungicide application in  
643 southern Brazil. *Crop Prot.* 2015; 67: 7-12.
- 644 45. Linsell KJ, Keiper FJ, Forgan A and Oldach KH. New insights into the infection  
645 process of *Rhynchosporium secalis* in barley using GFP. *Fungal Genet Biol.*  
646 2011; 48: 124–131.
- 647 46. Robinson J and Jalli M. Grain yield, net blotch and scald of barley in Finnish  
648 official variety trials. *Agr Food Sci Finland.* 1997; 6: 399-408.



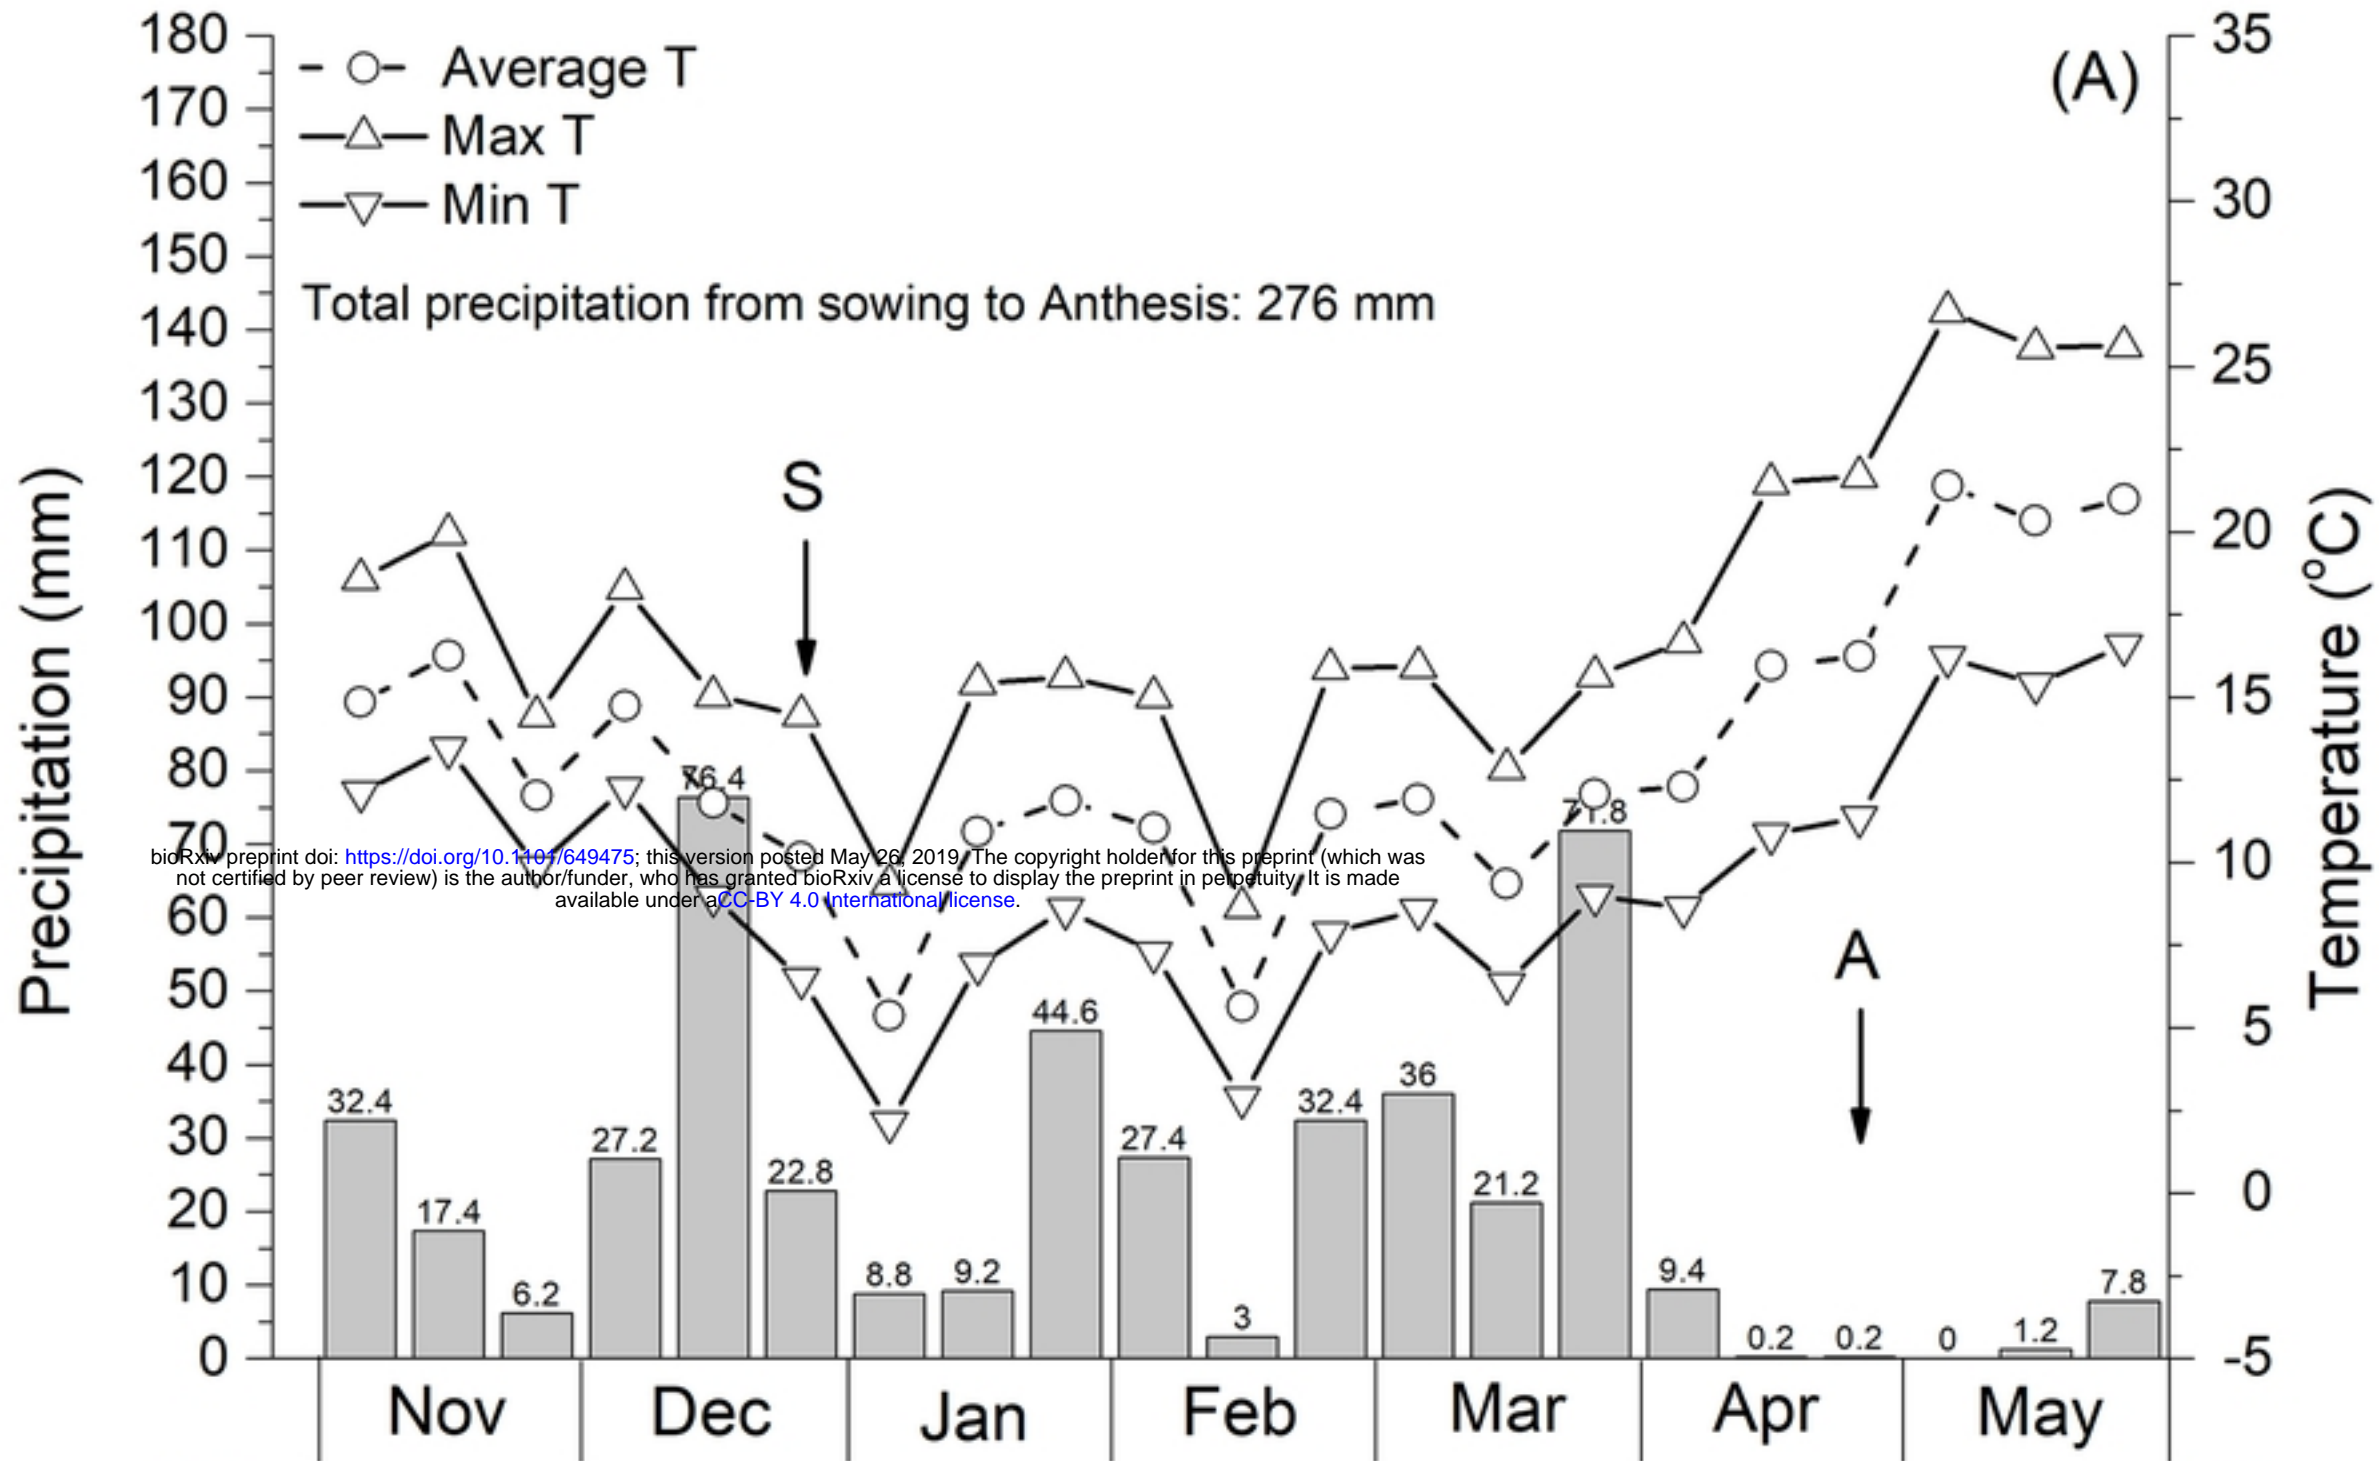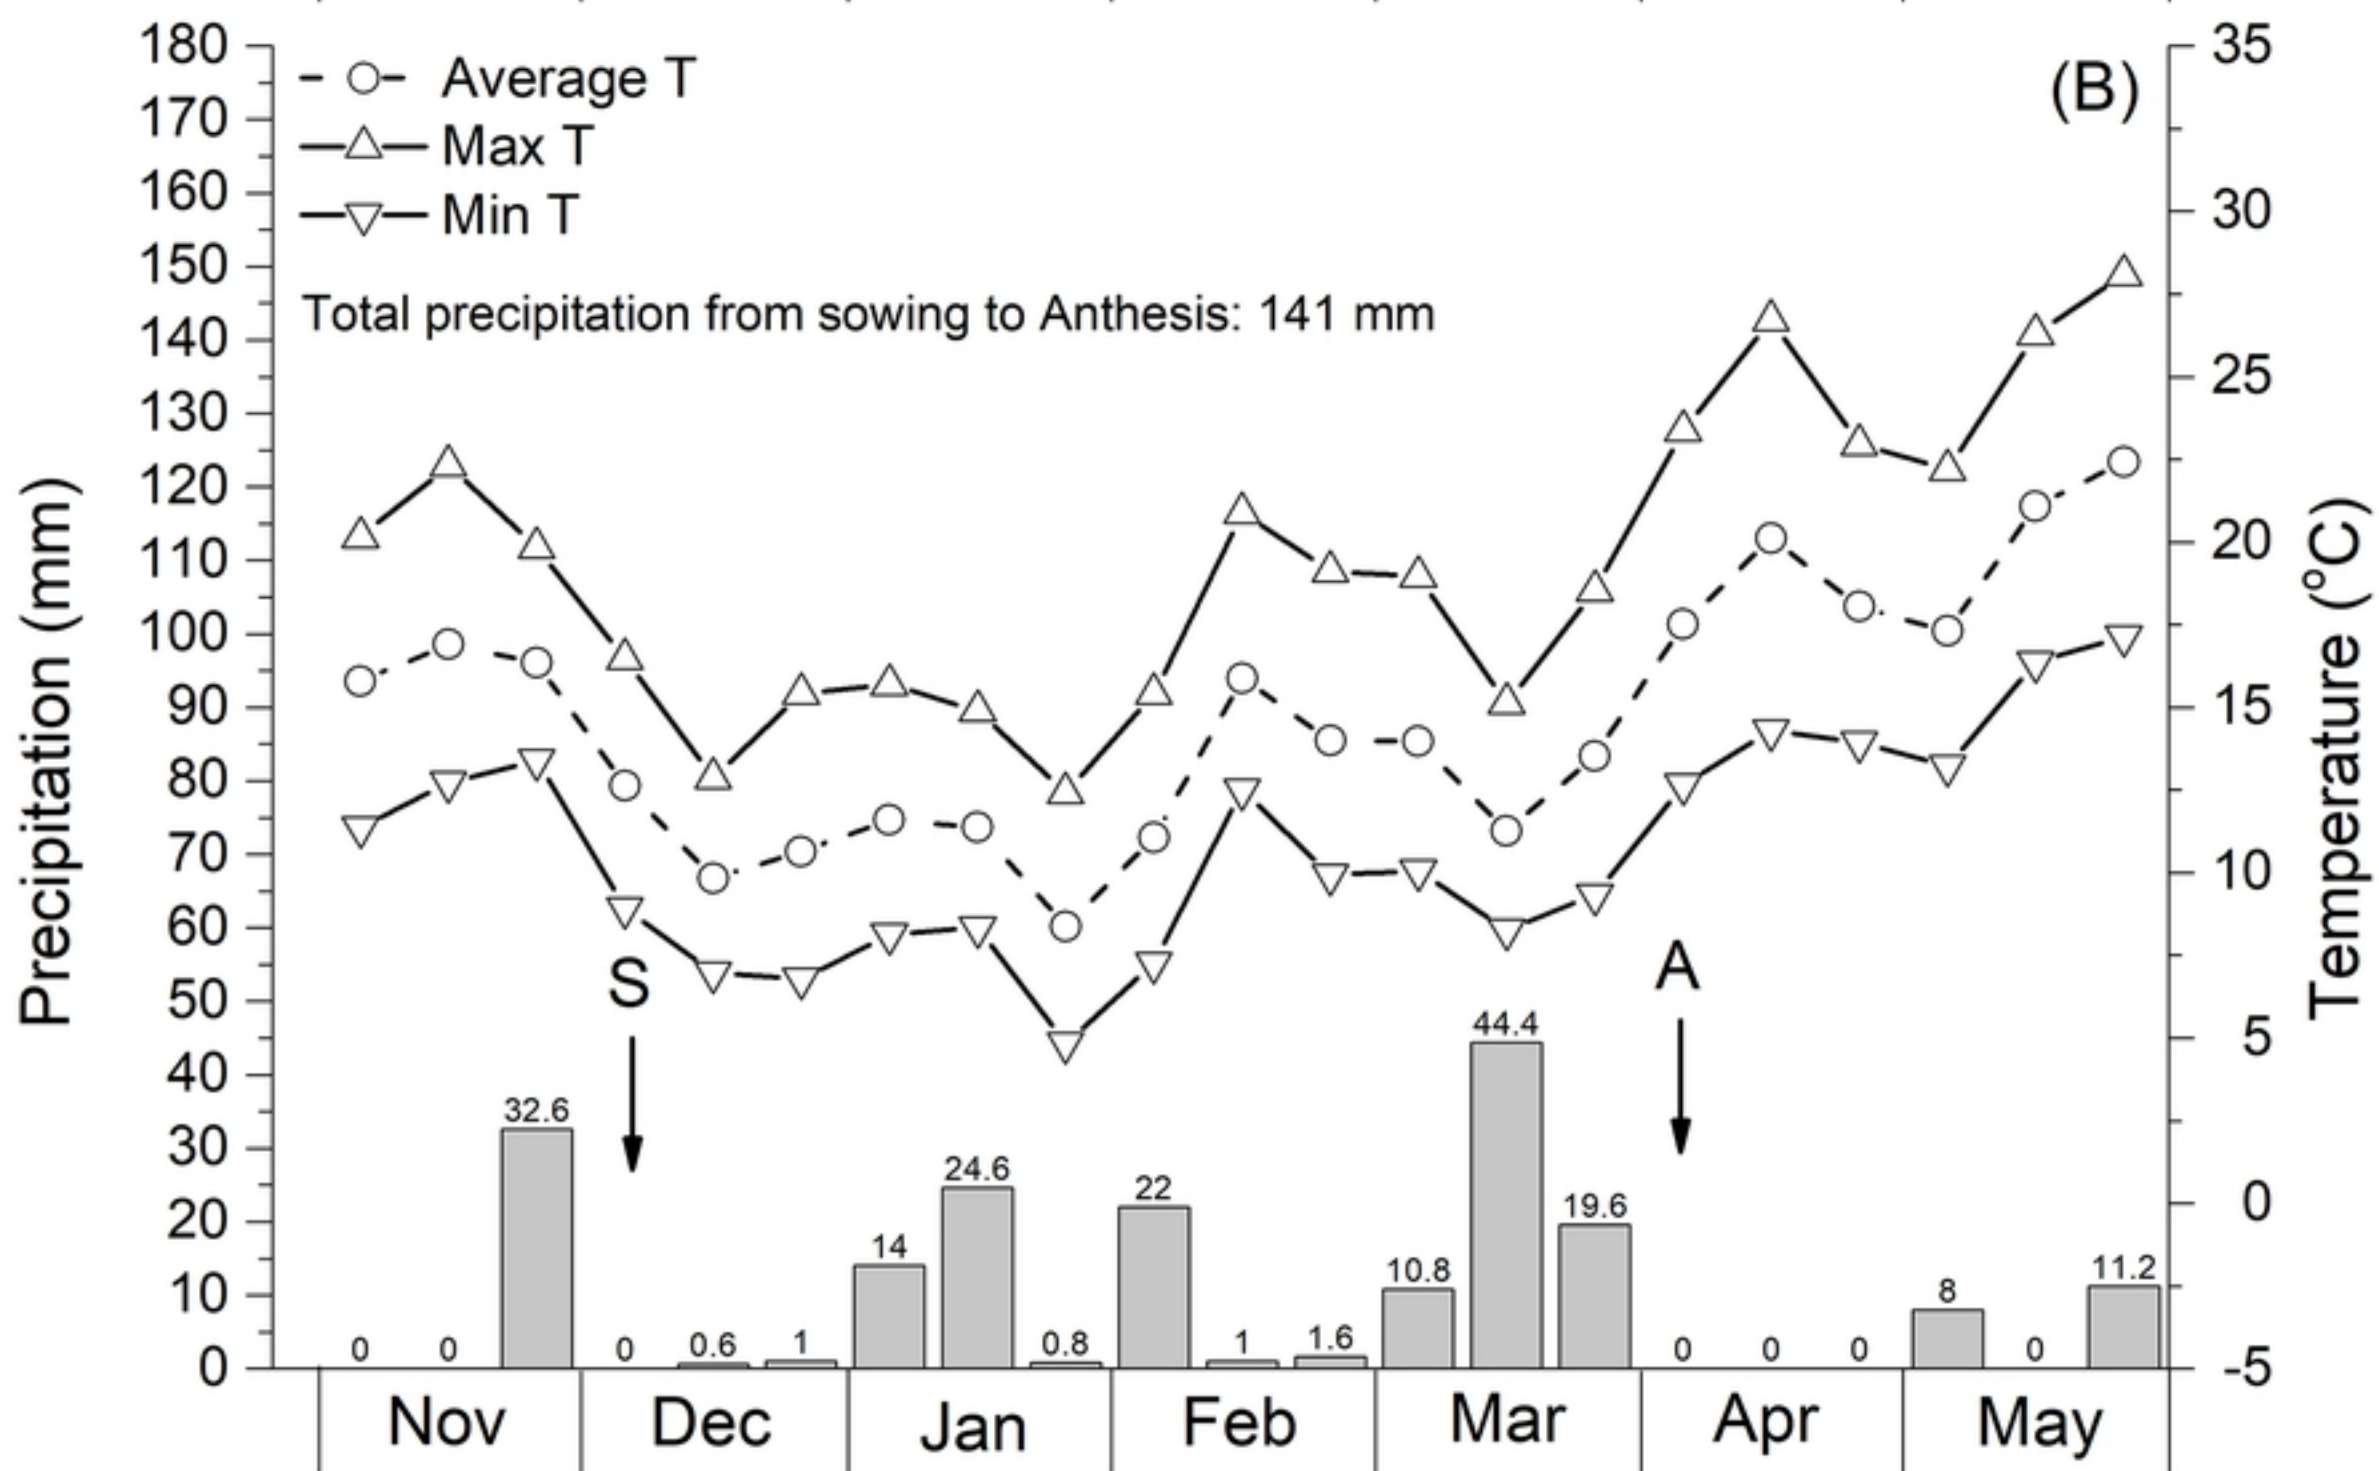

Figure

# Exp 1

# Exp 2

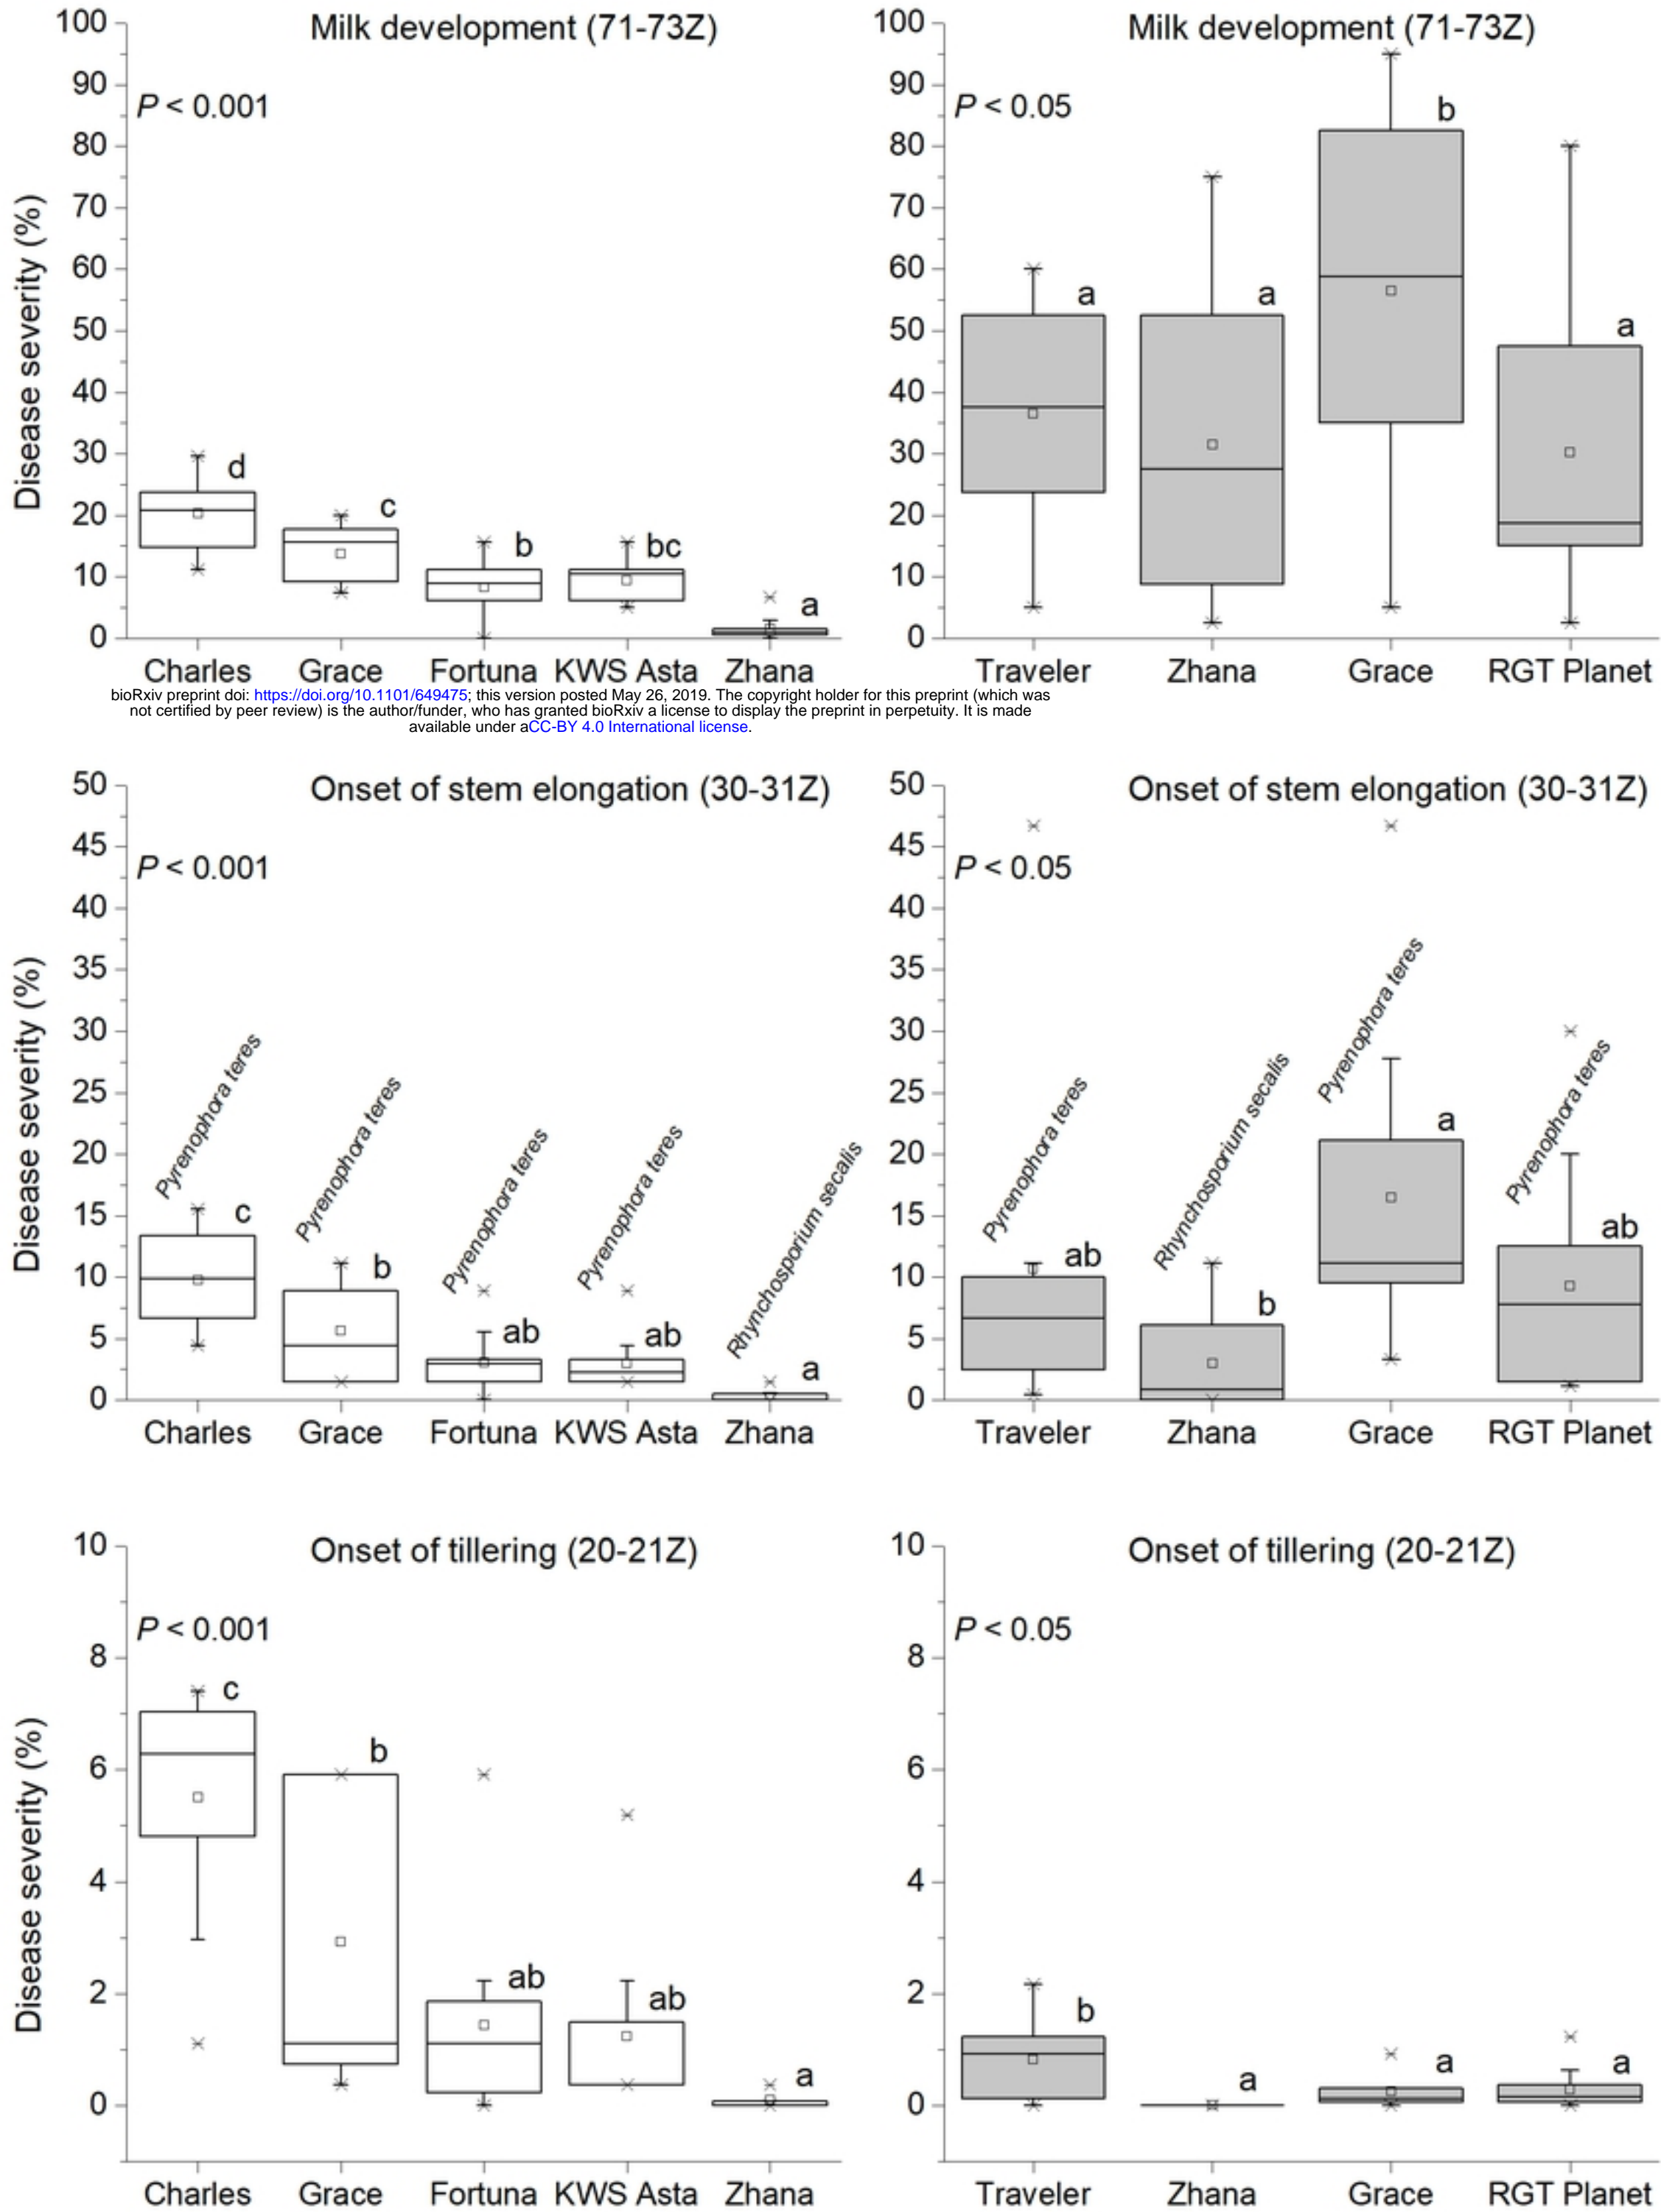

Figure



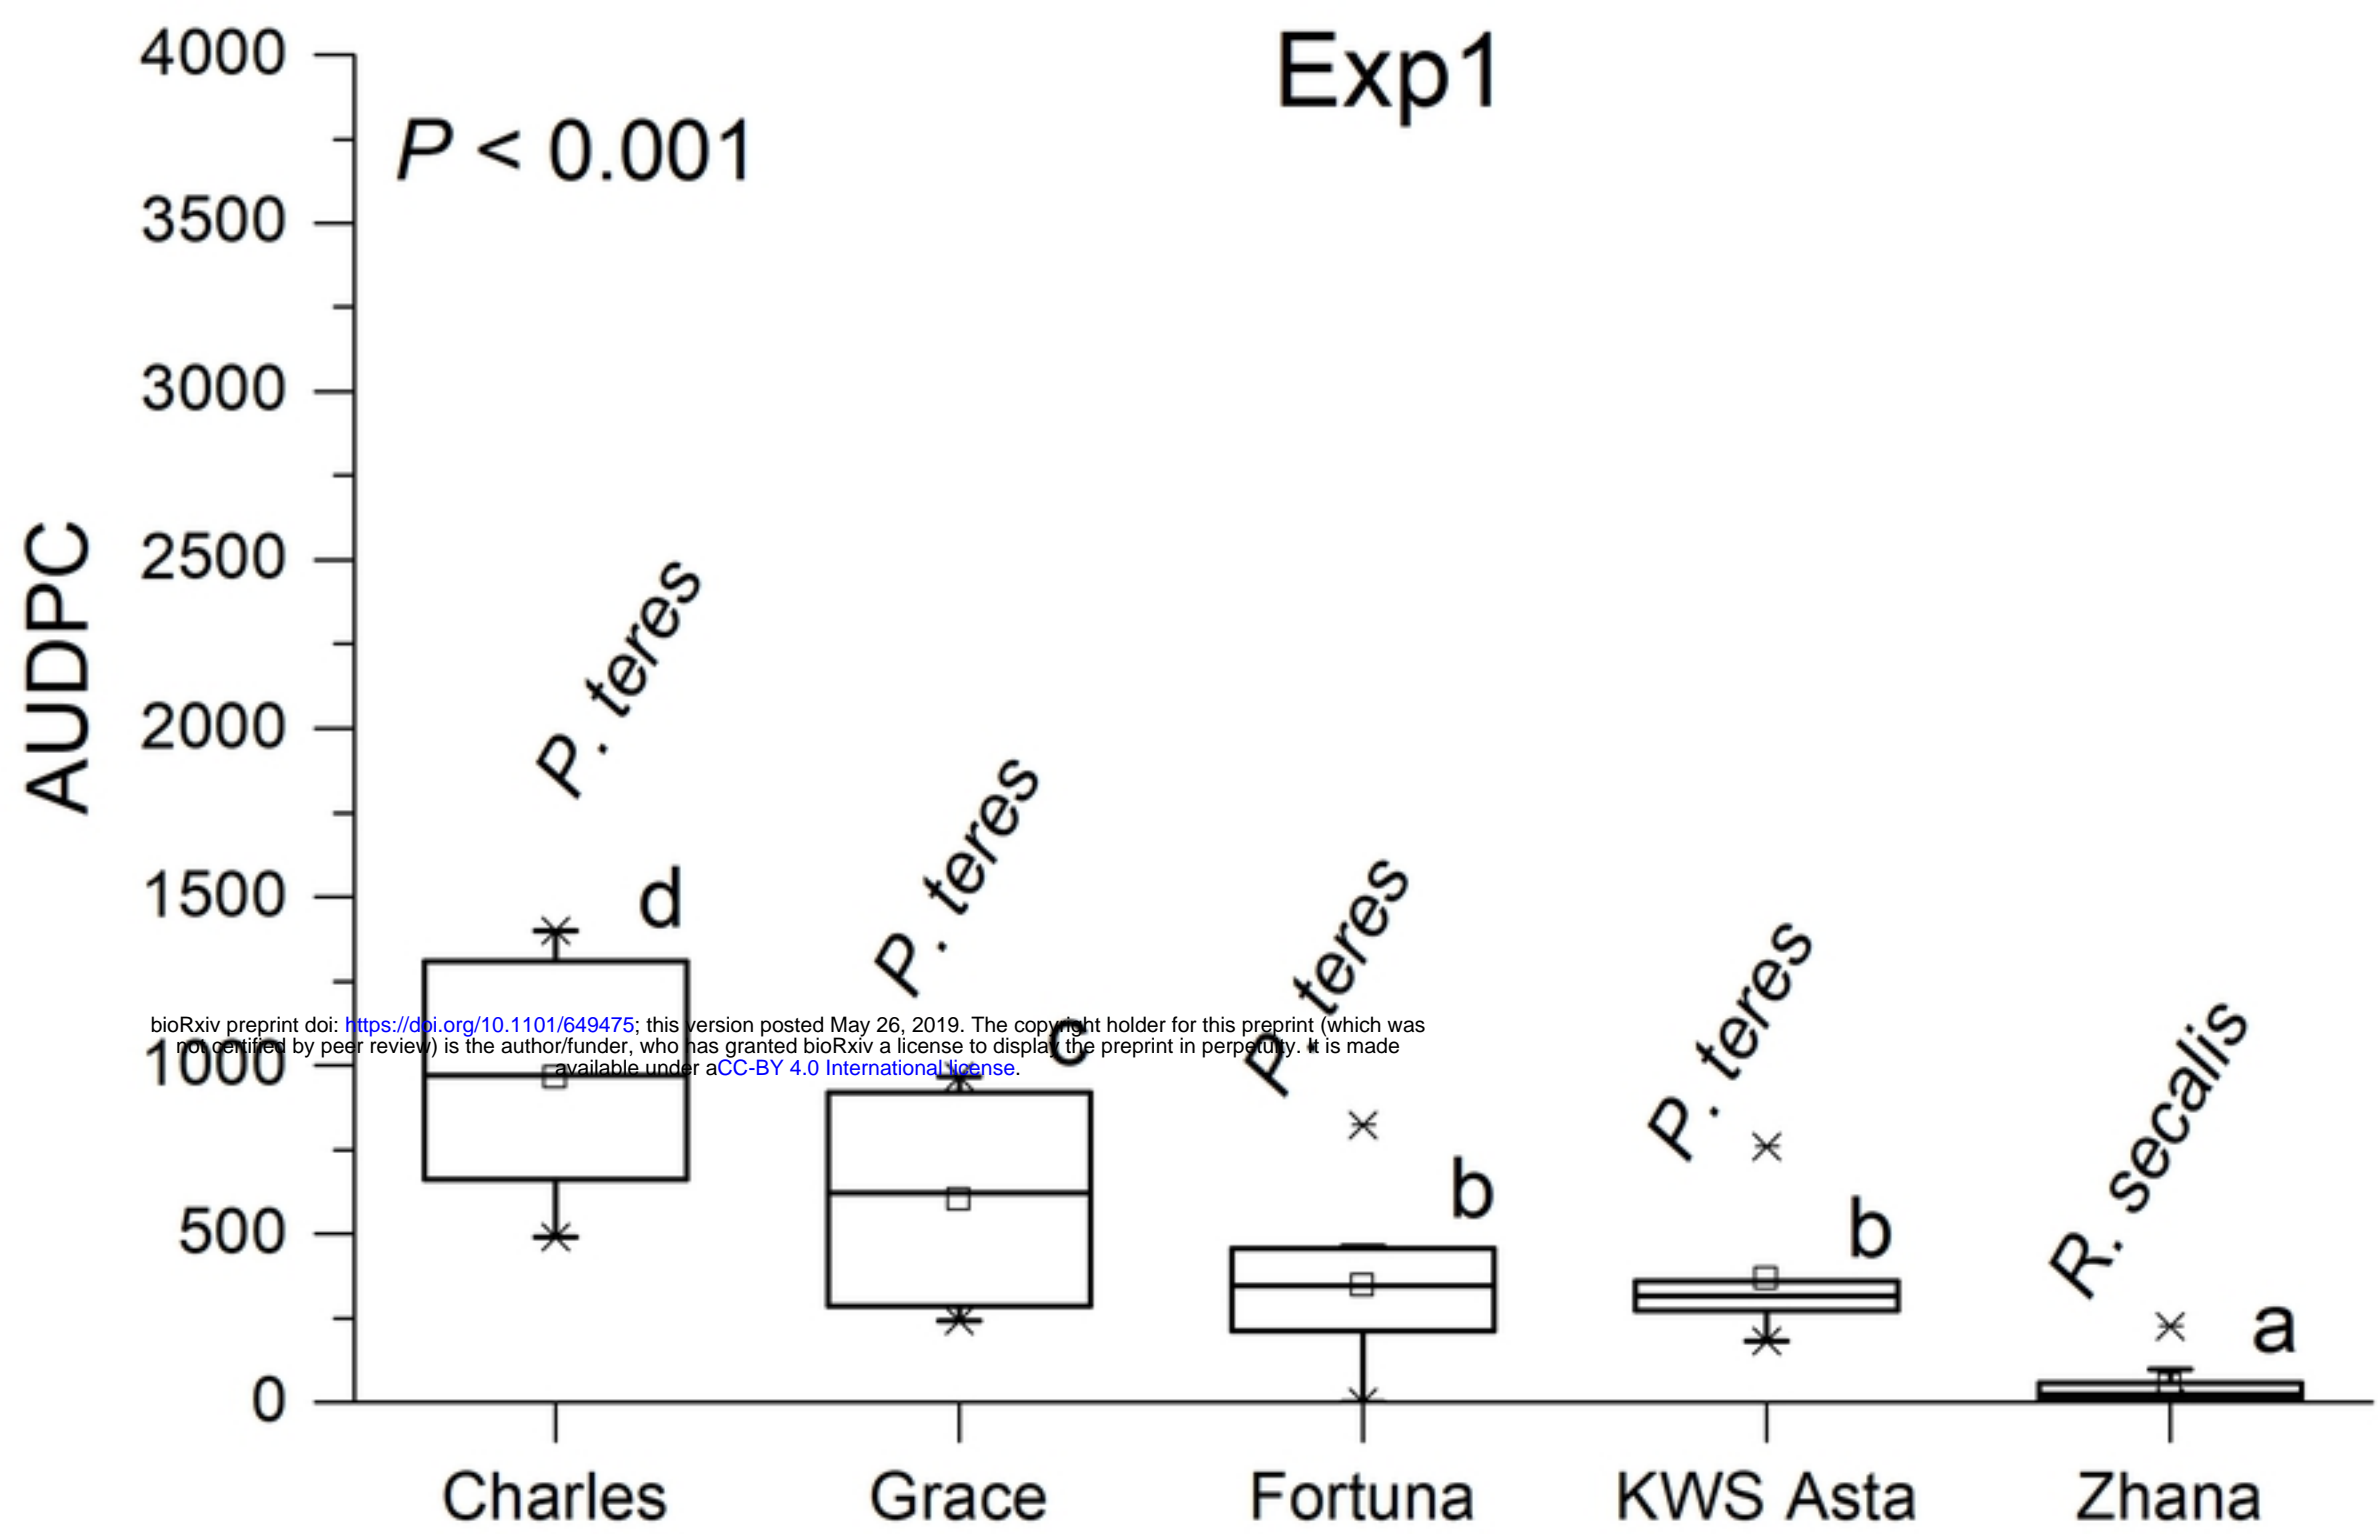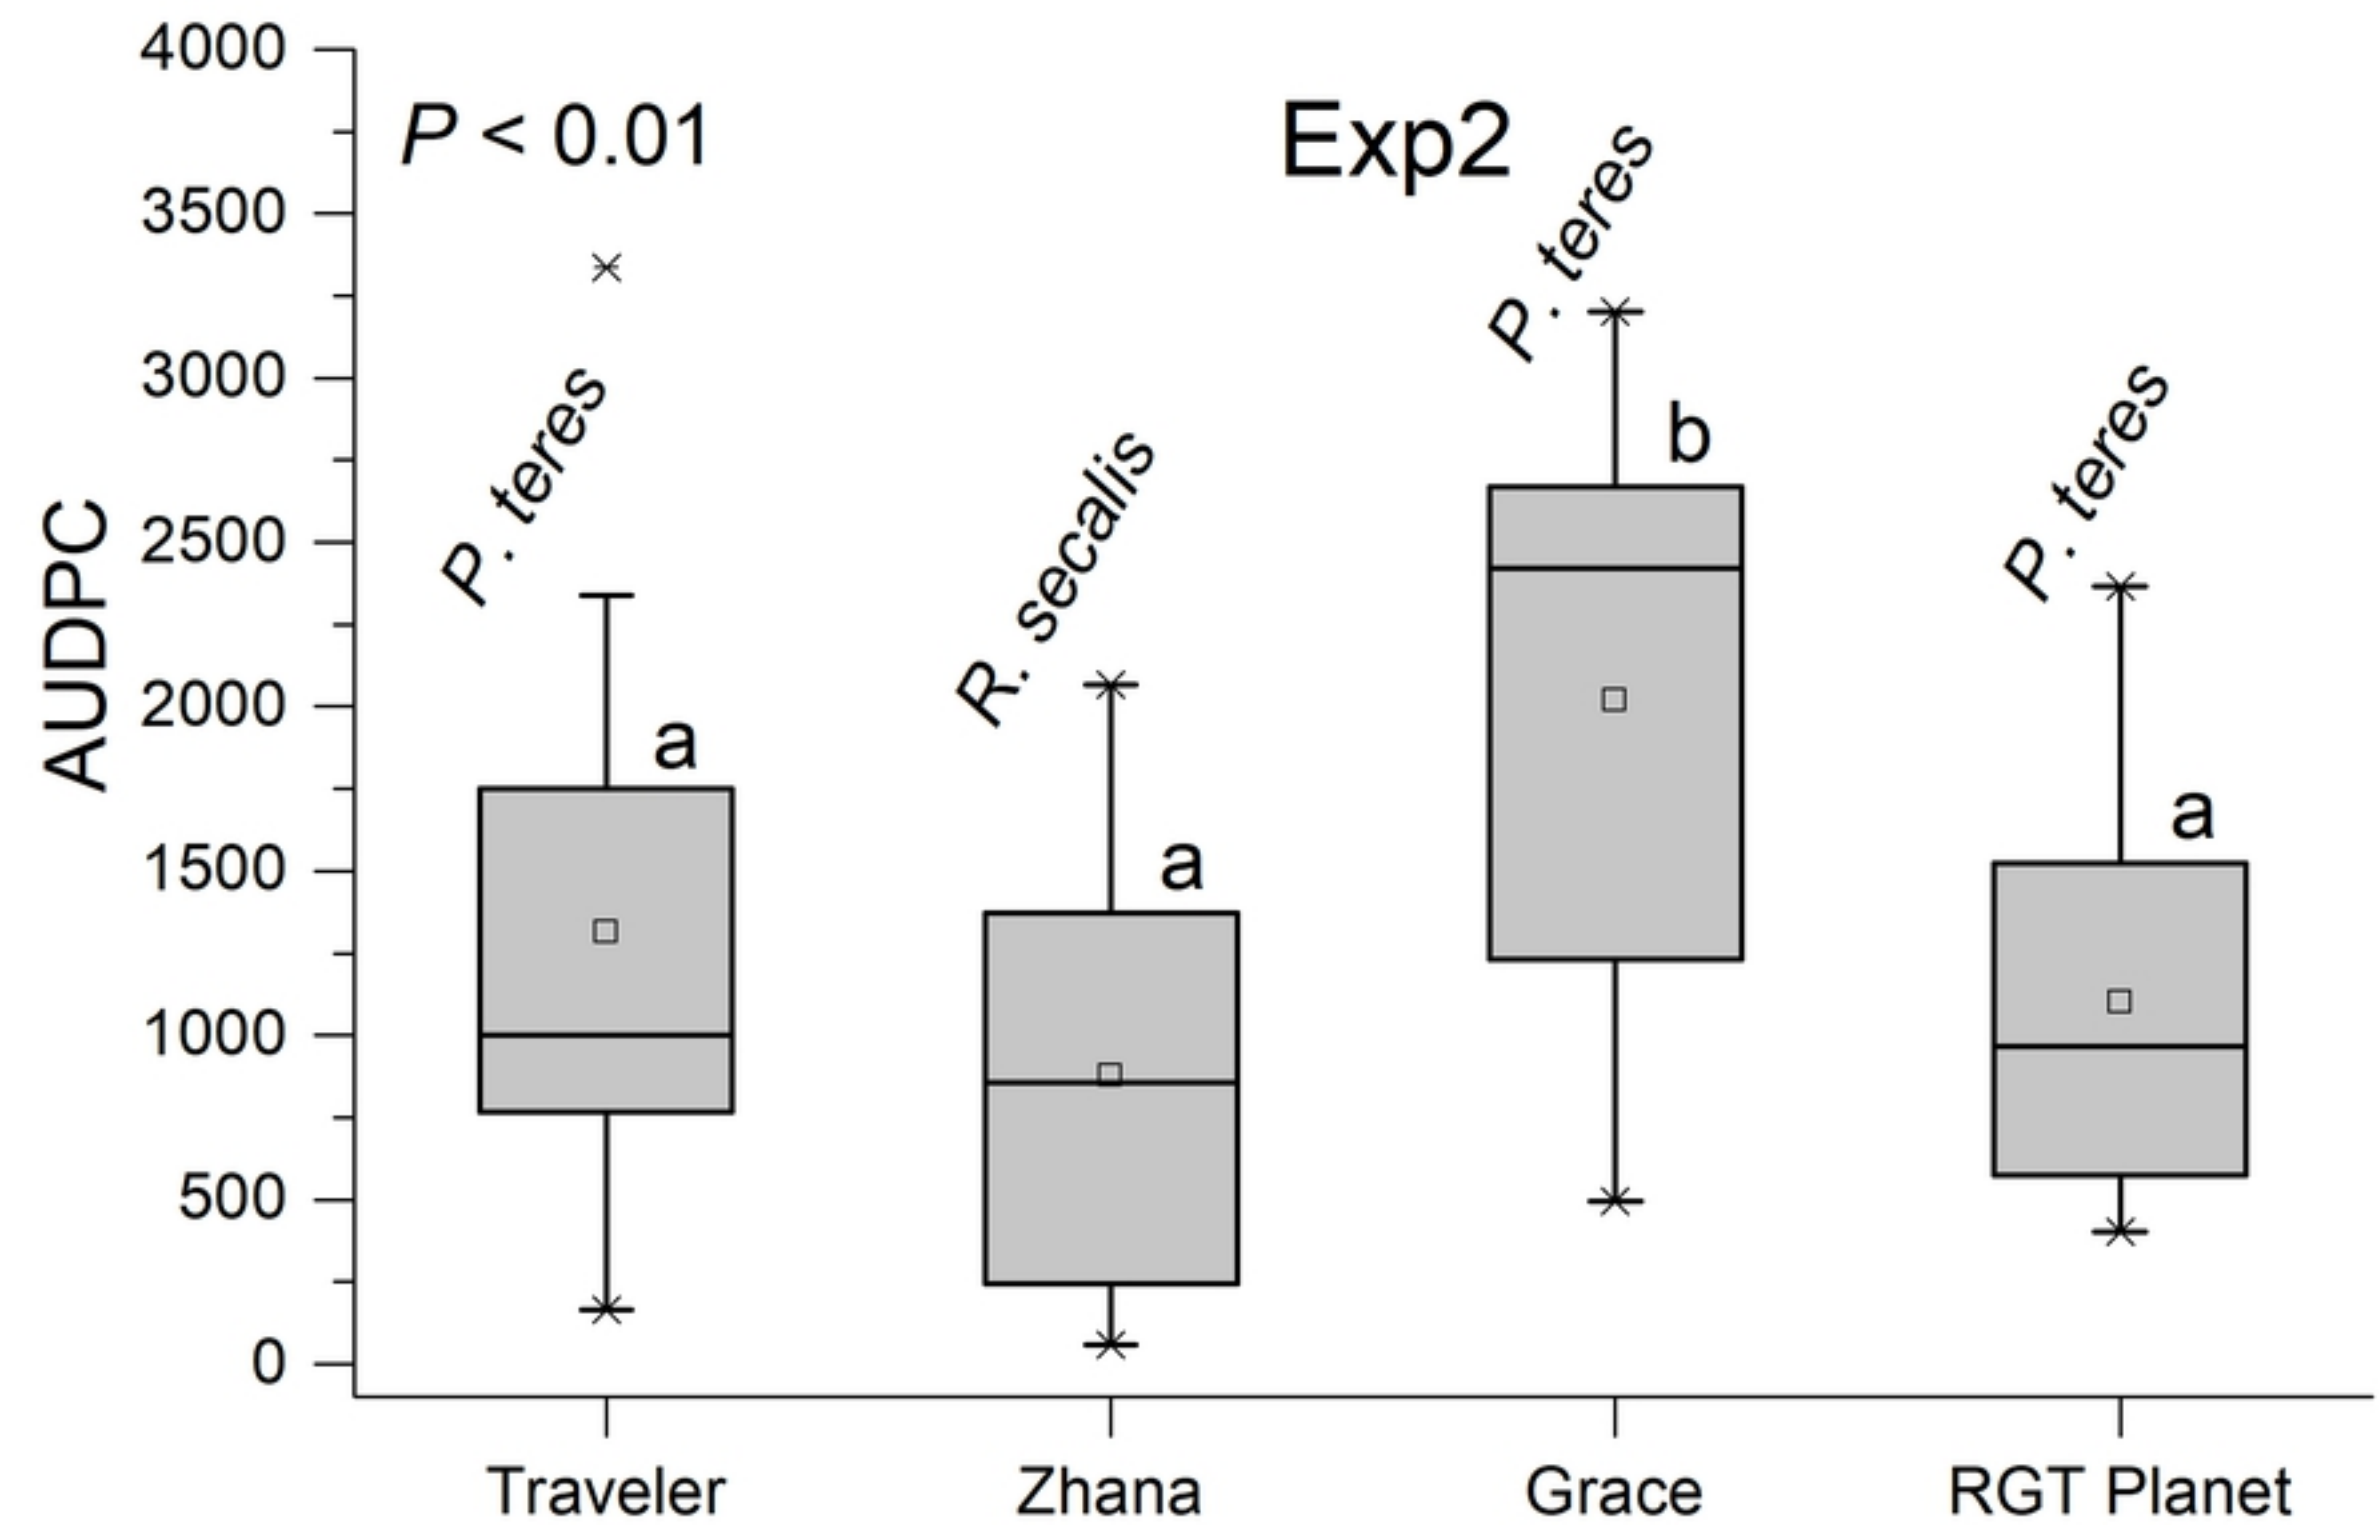

Figure

## Milk development (71-73Z)

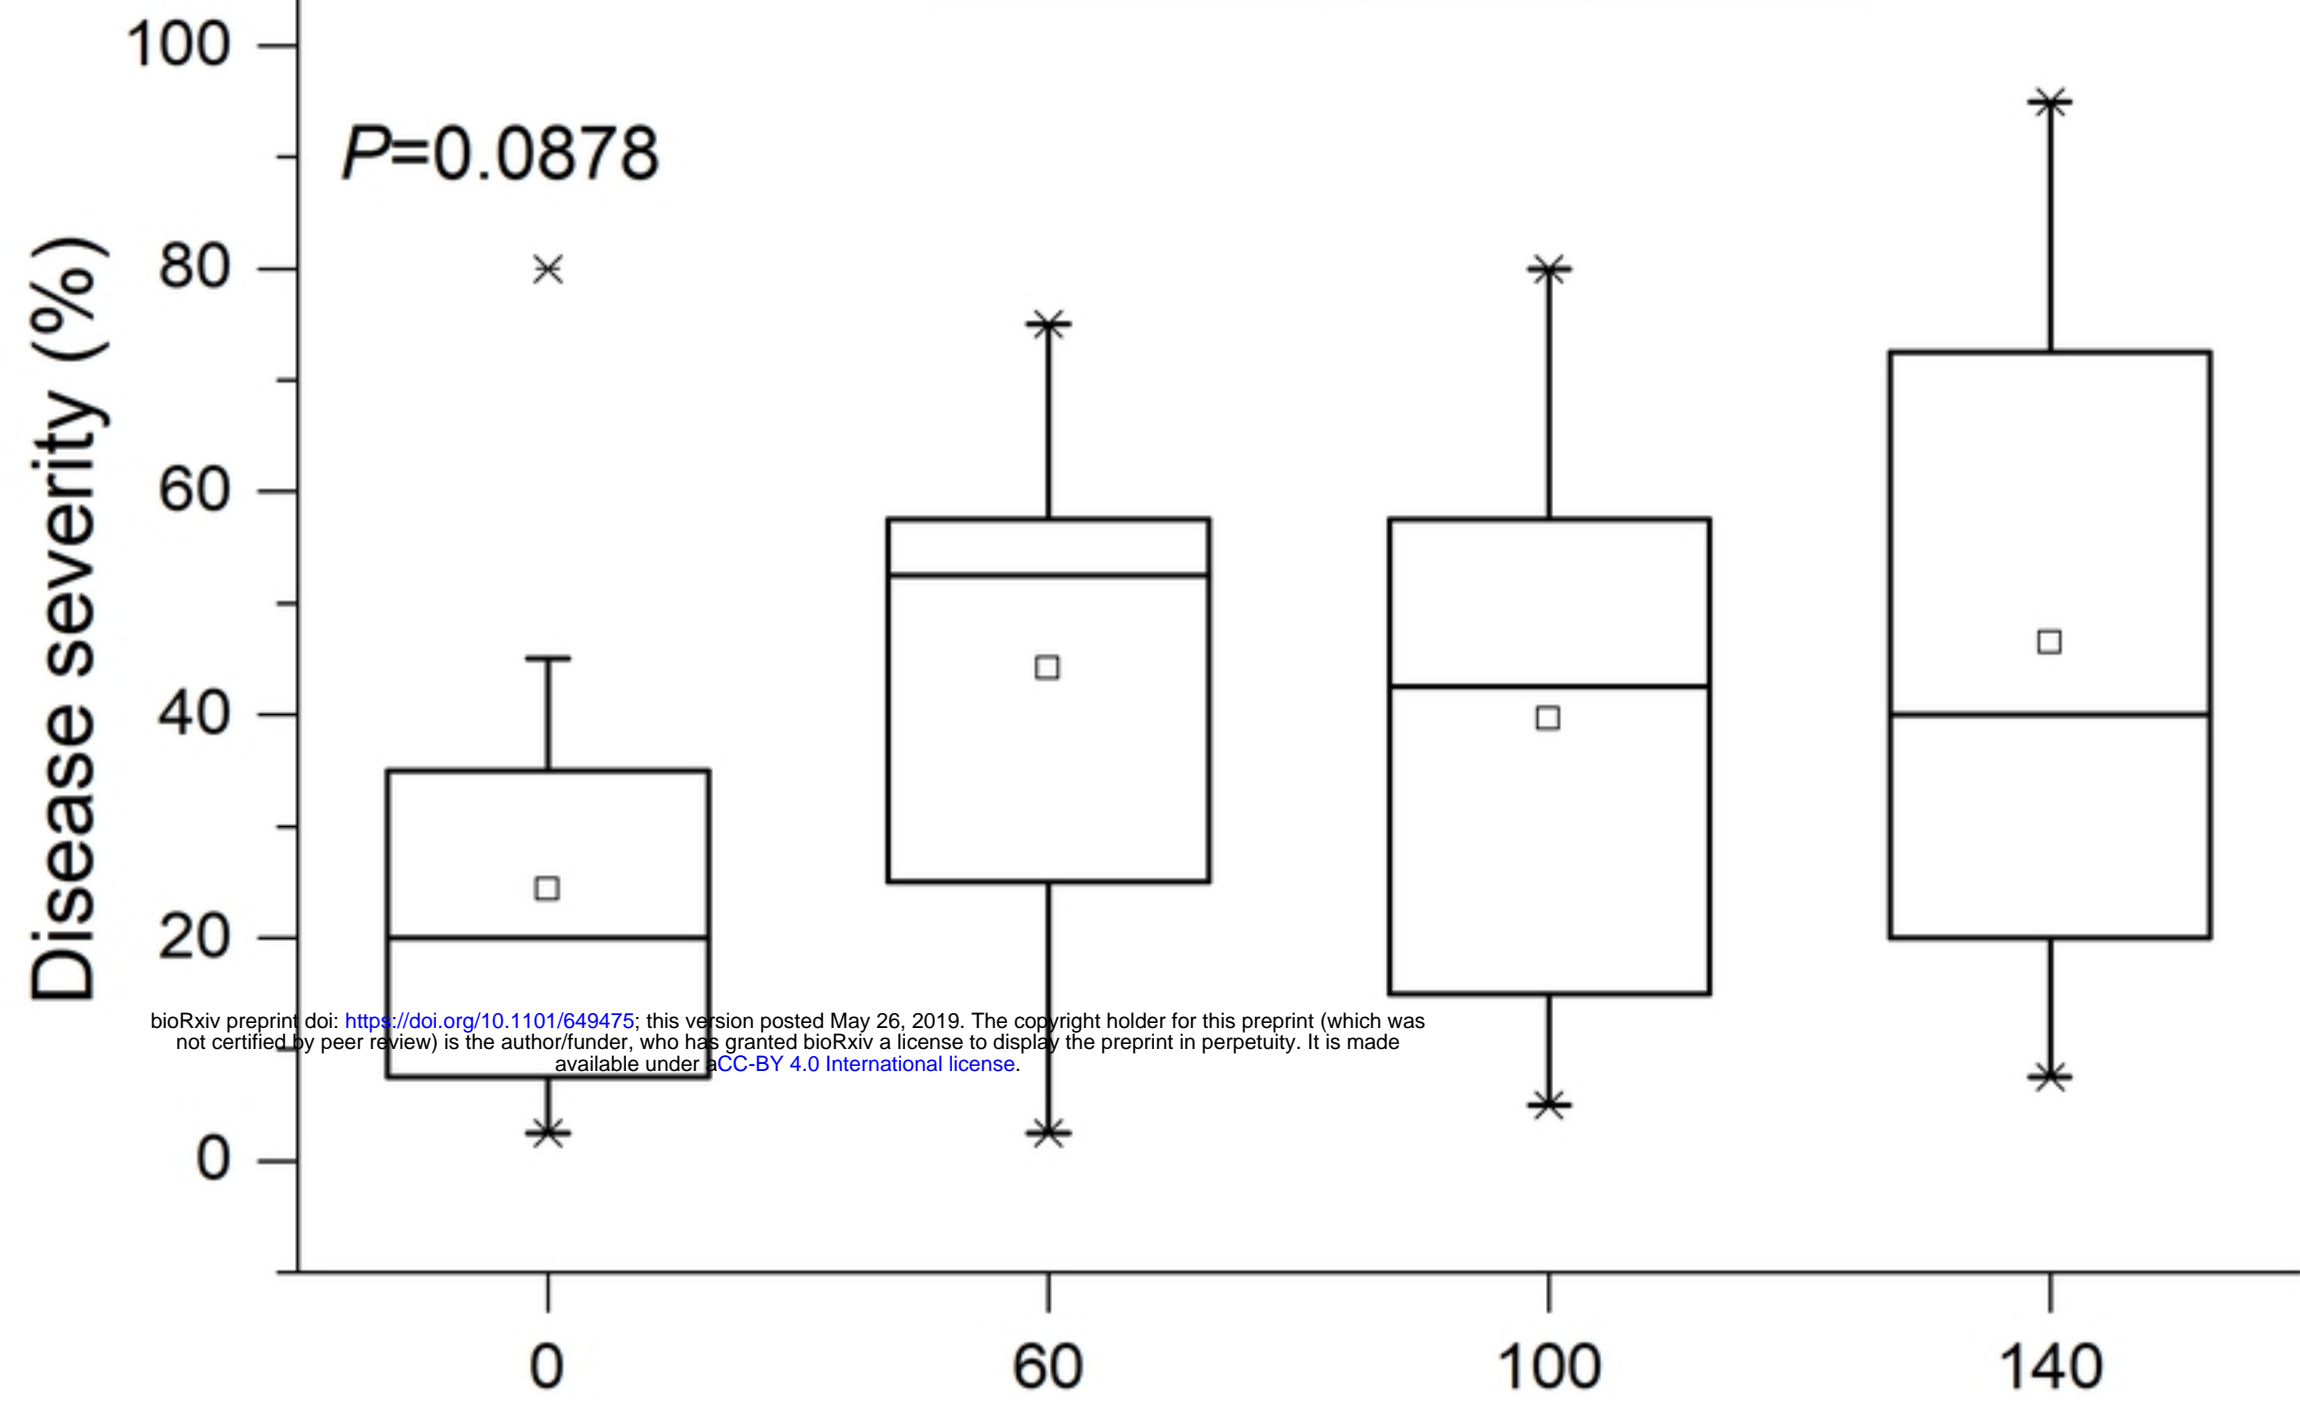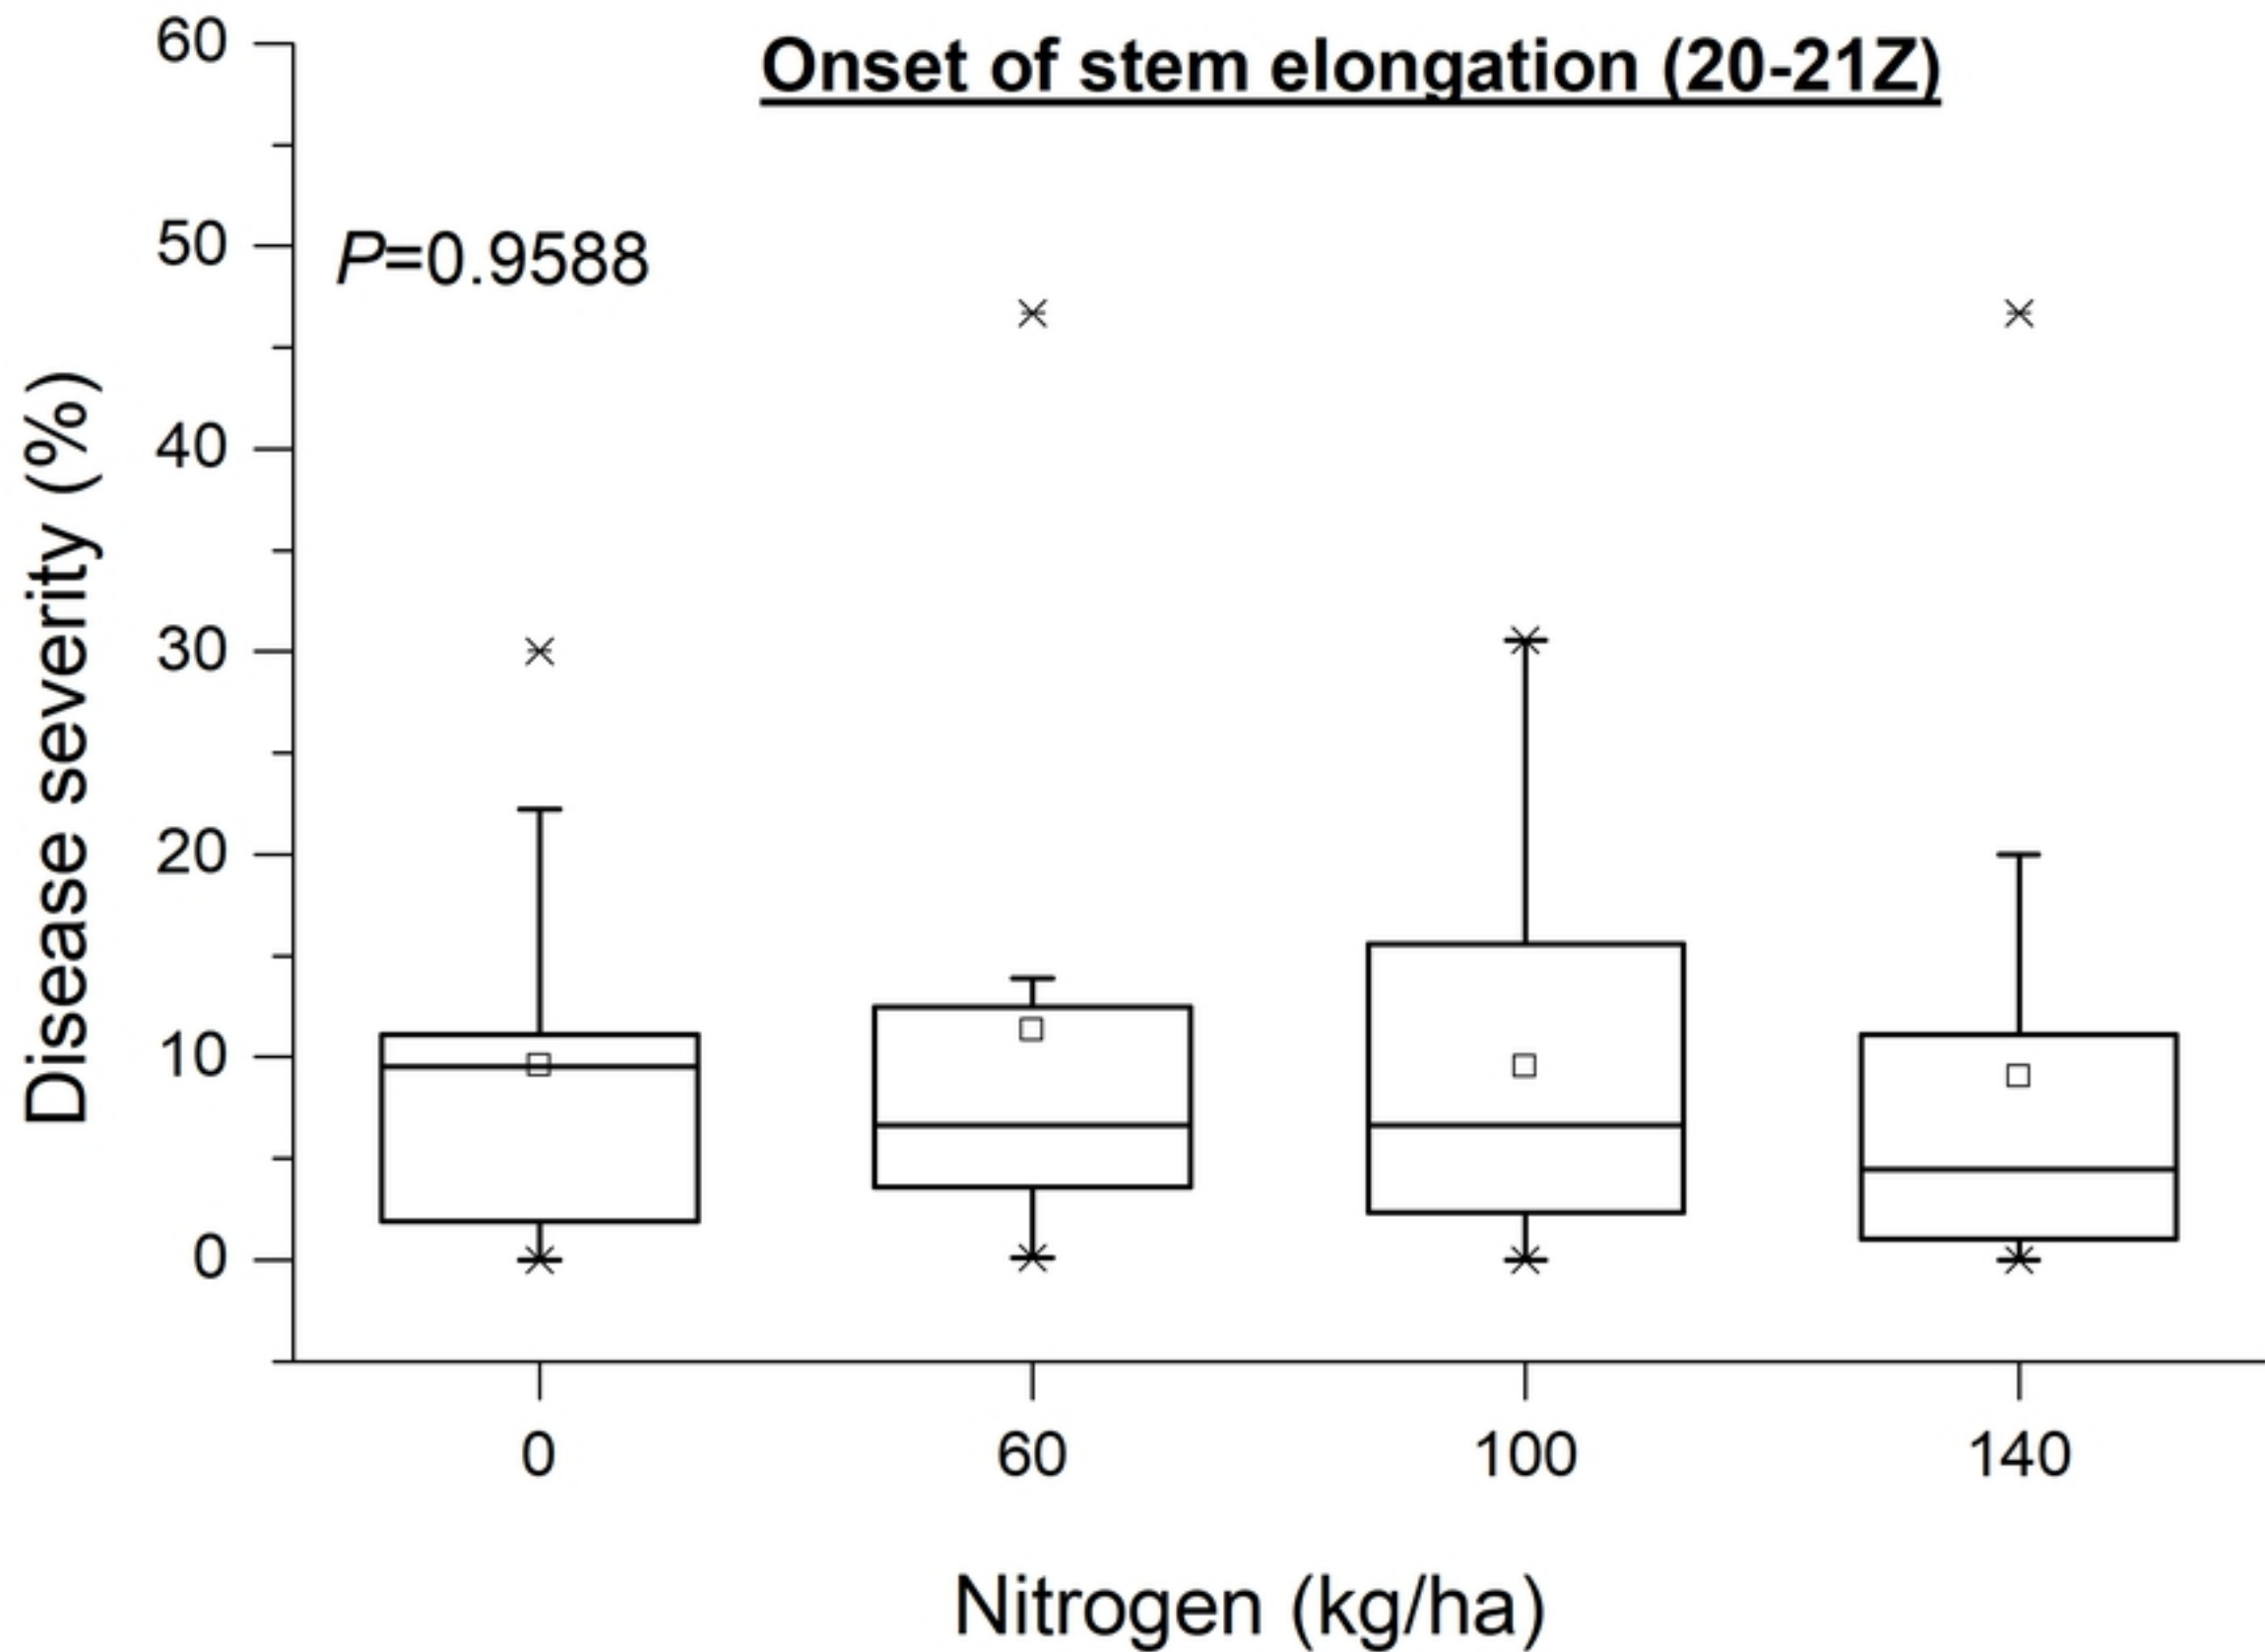

Figure



### Grain protein content (%)

### Maltability (%)

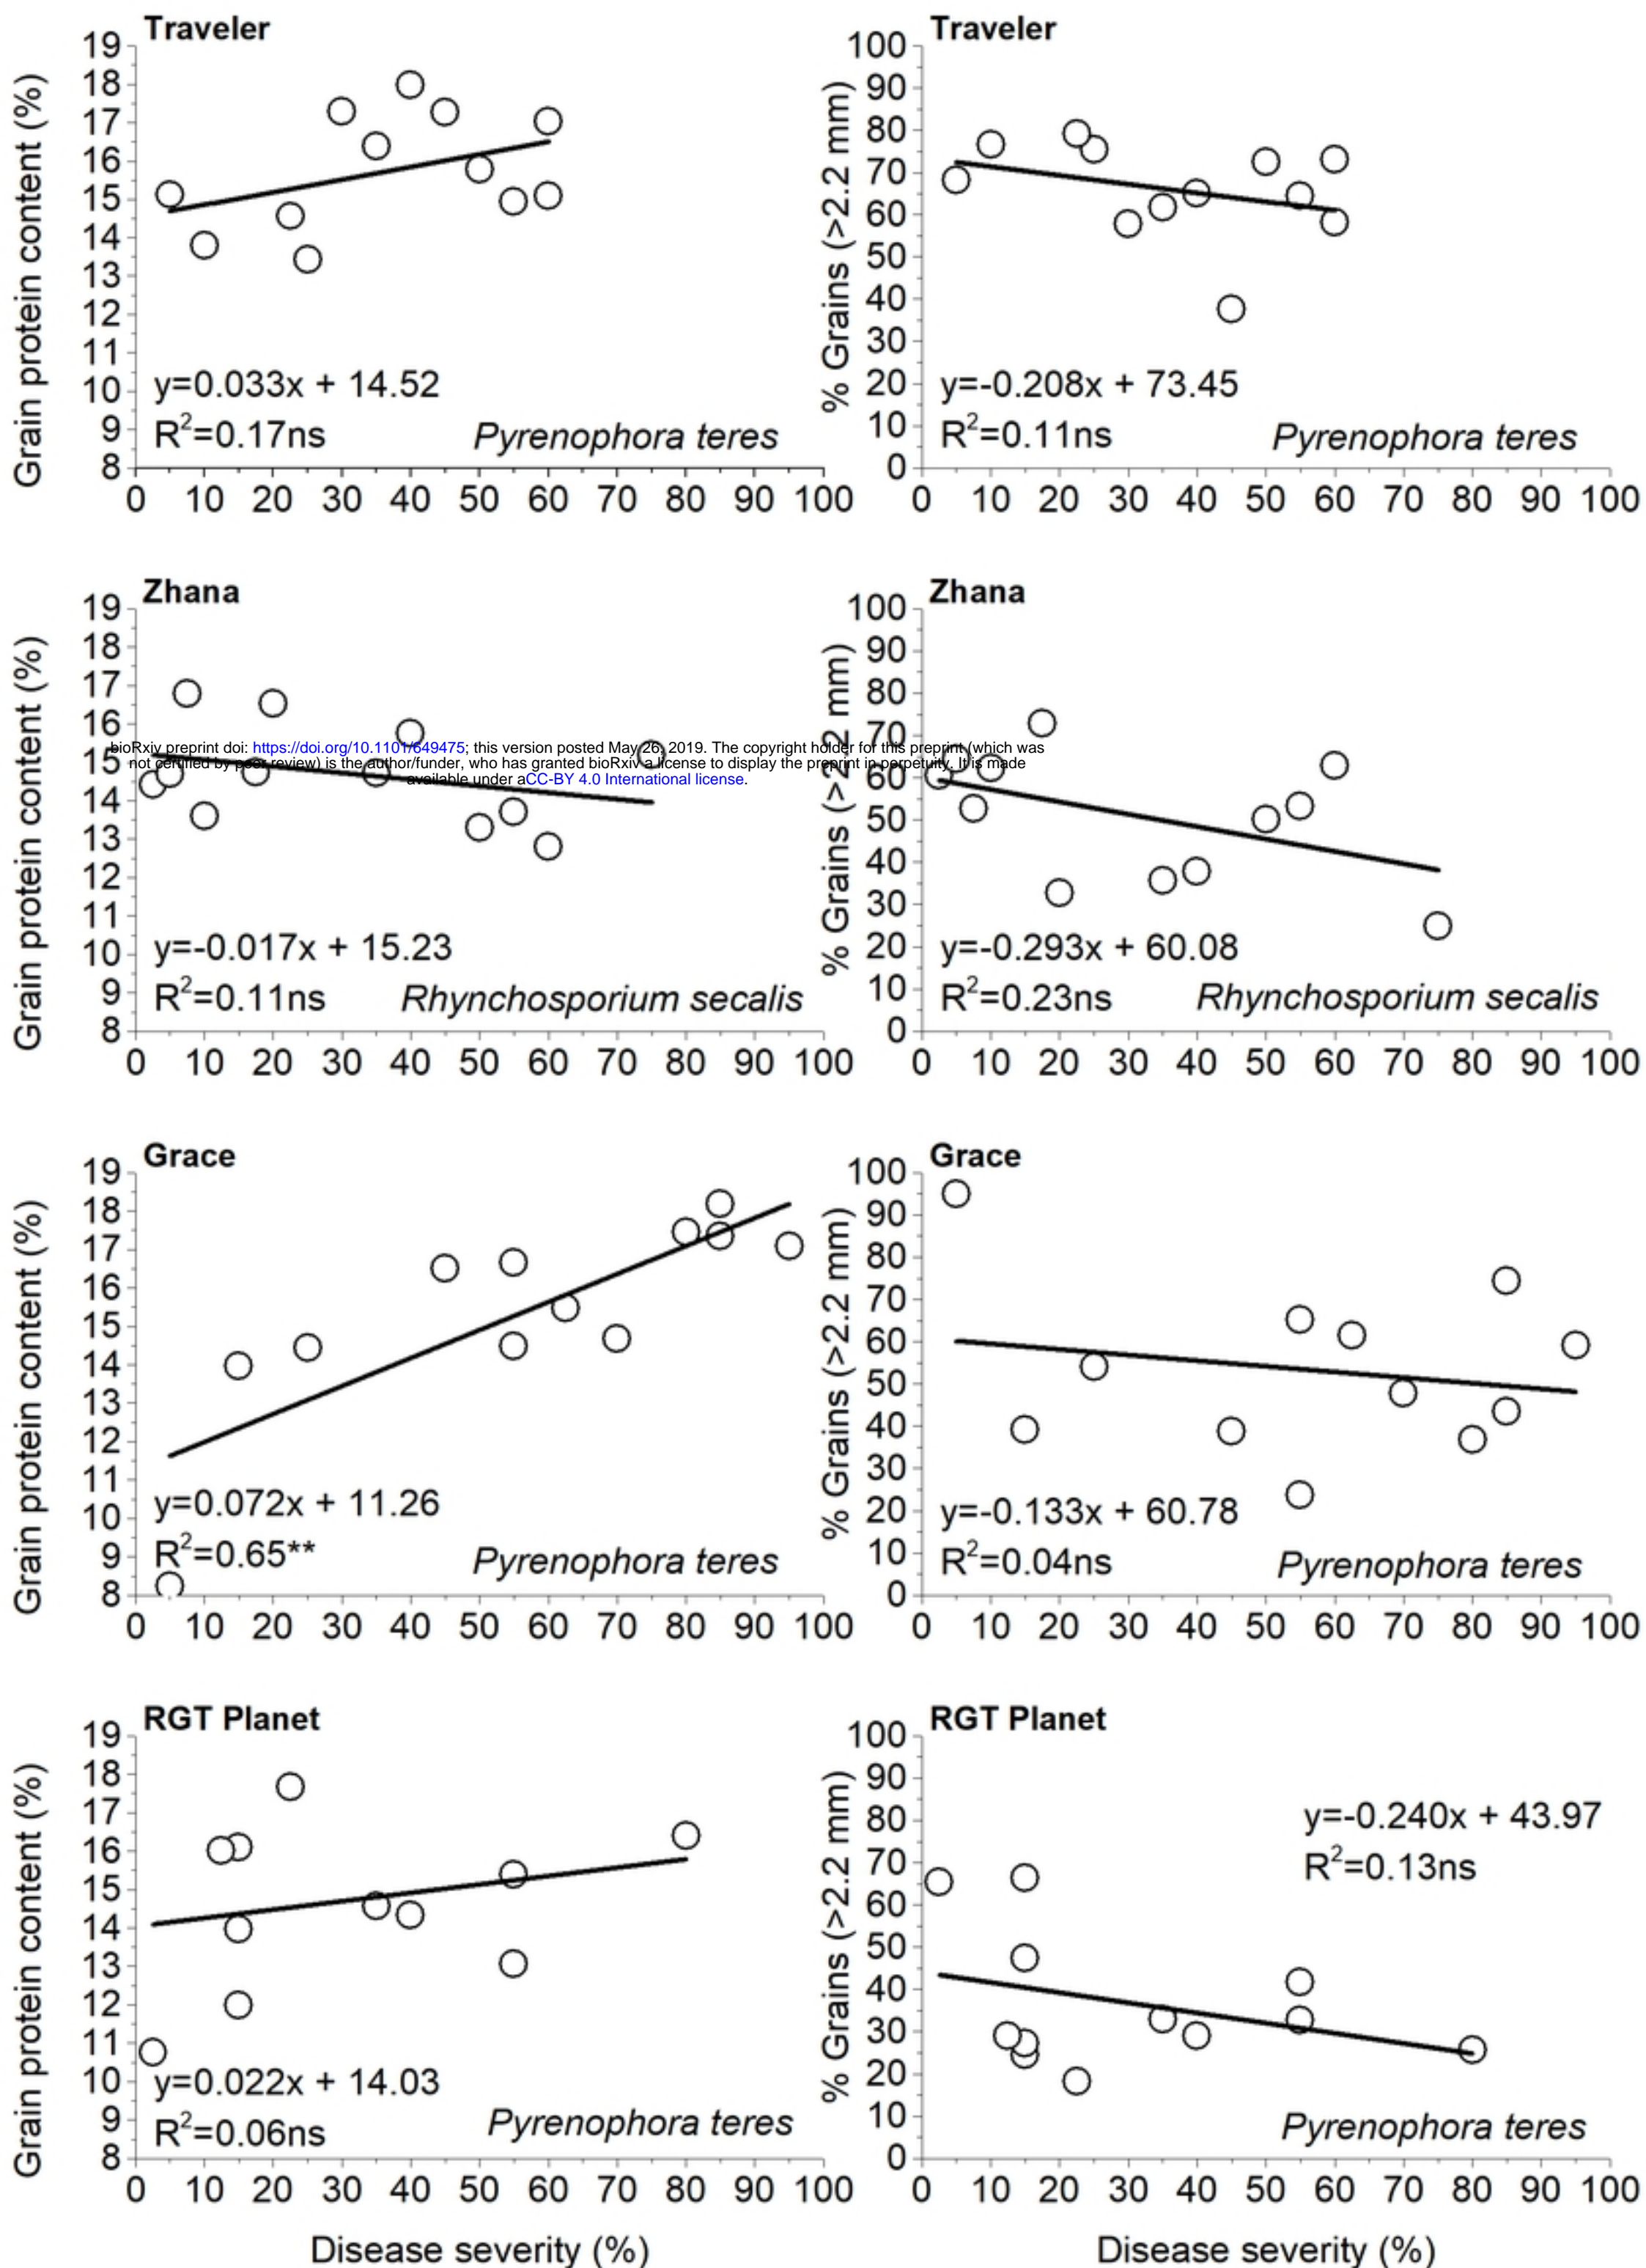

Figure



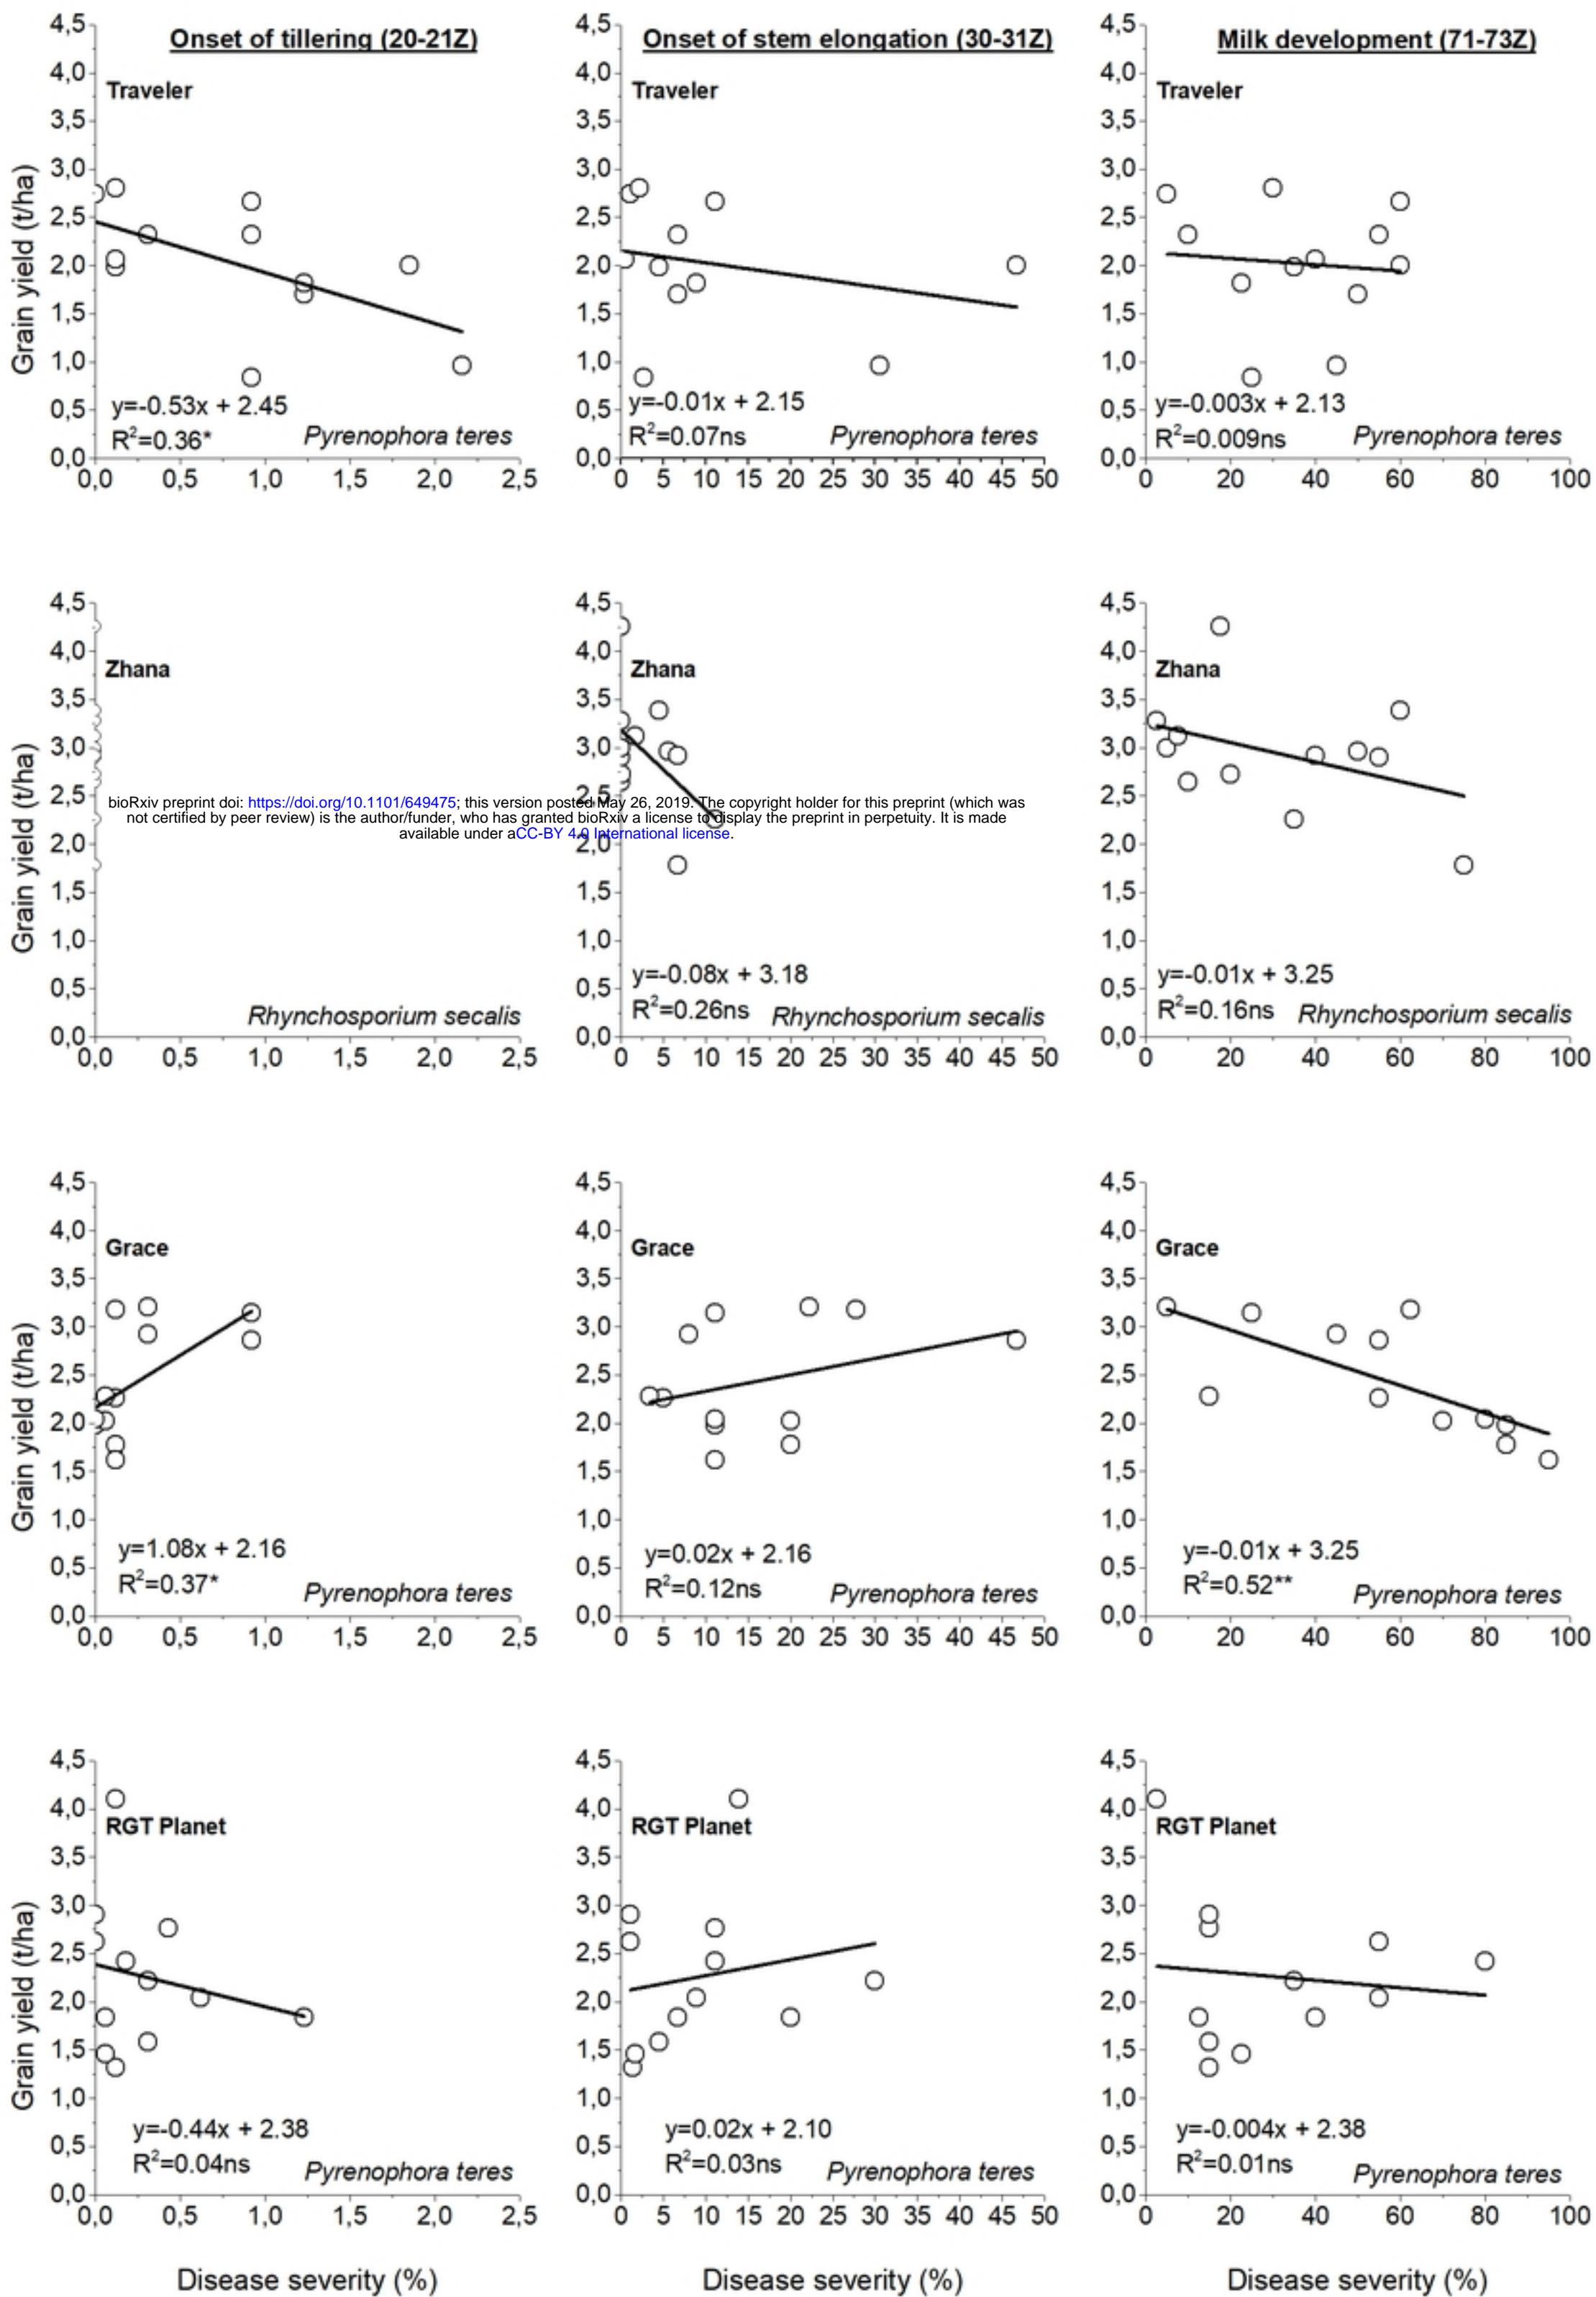

Figure



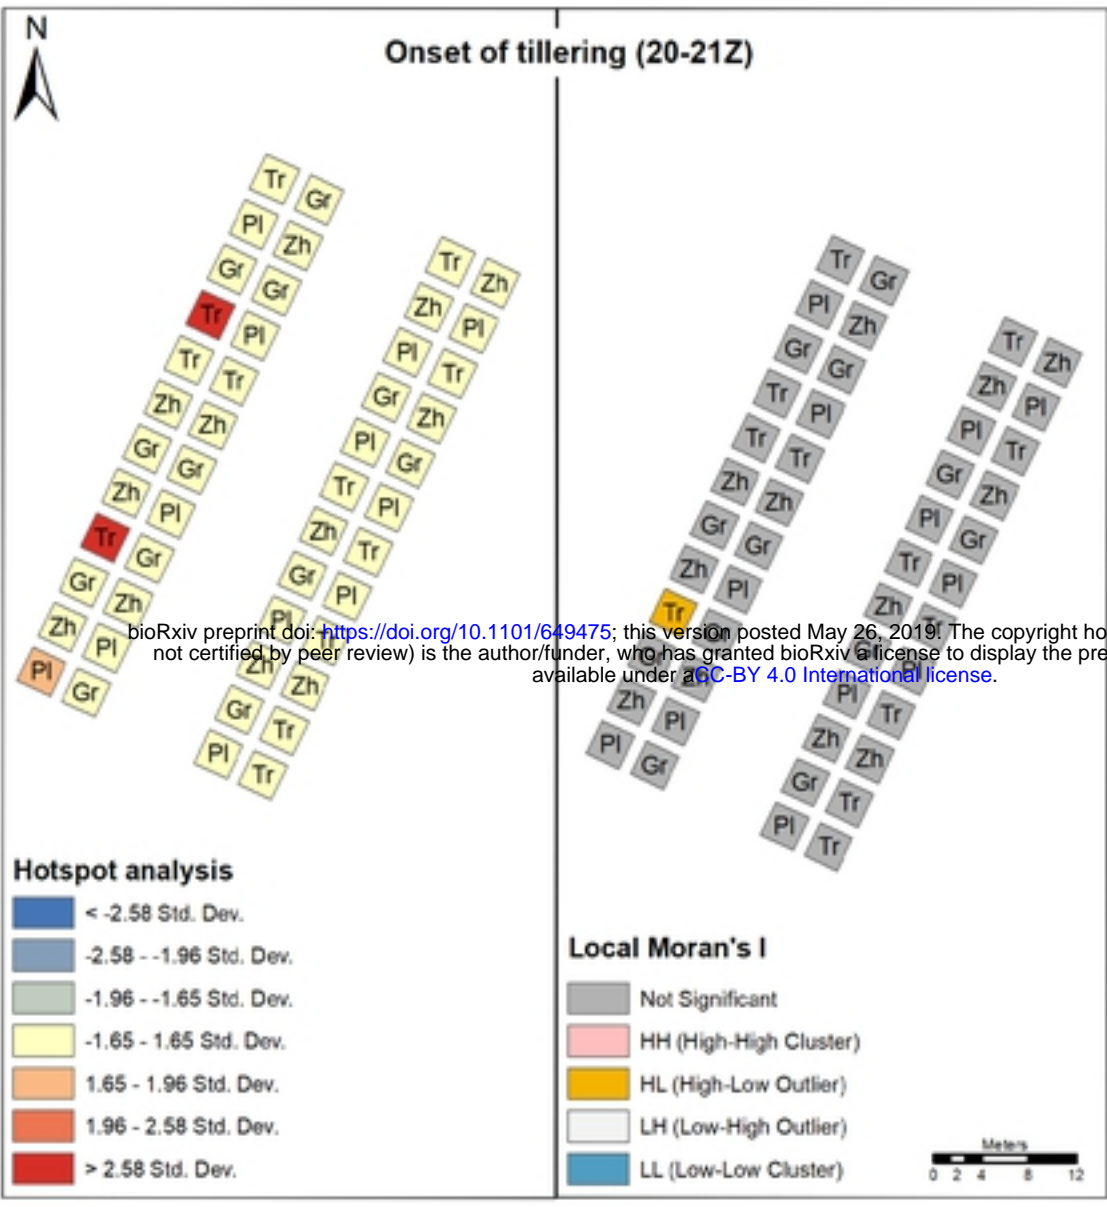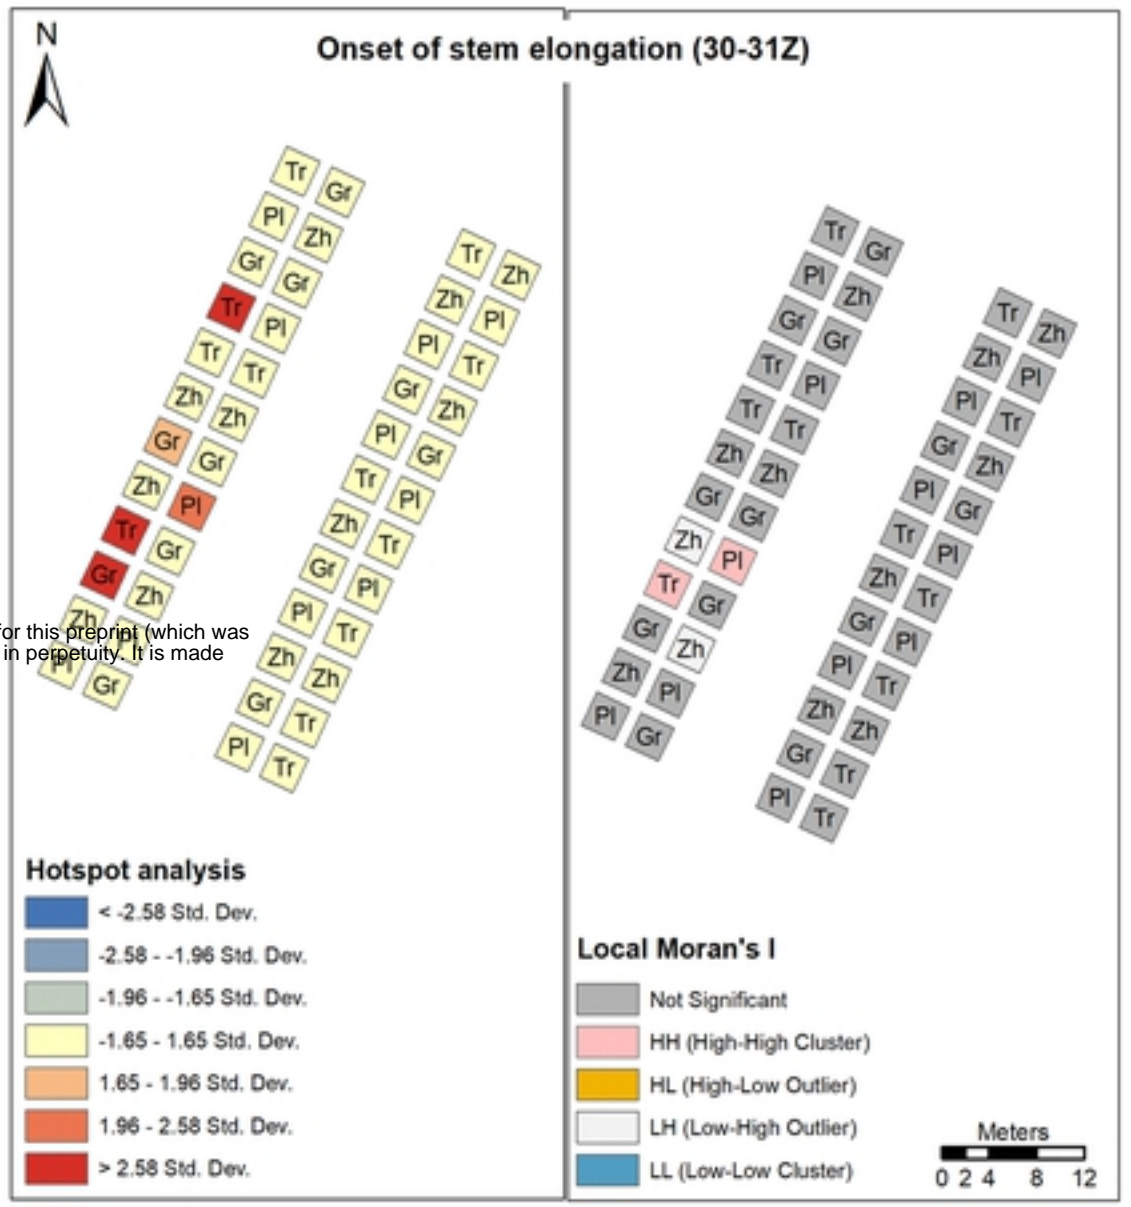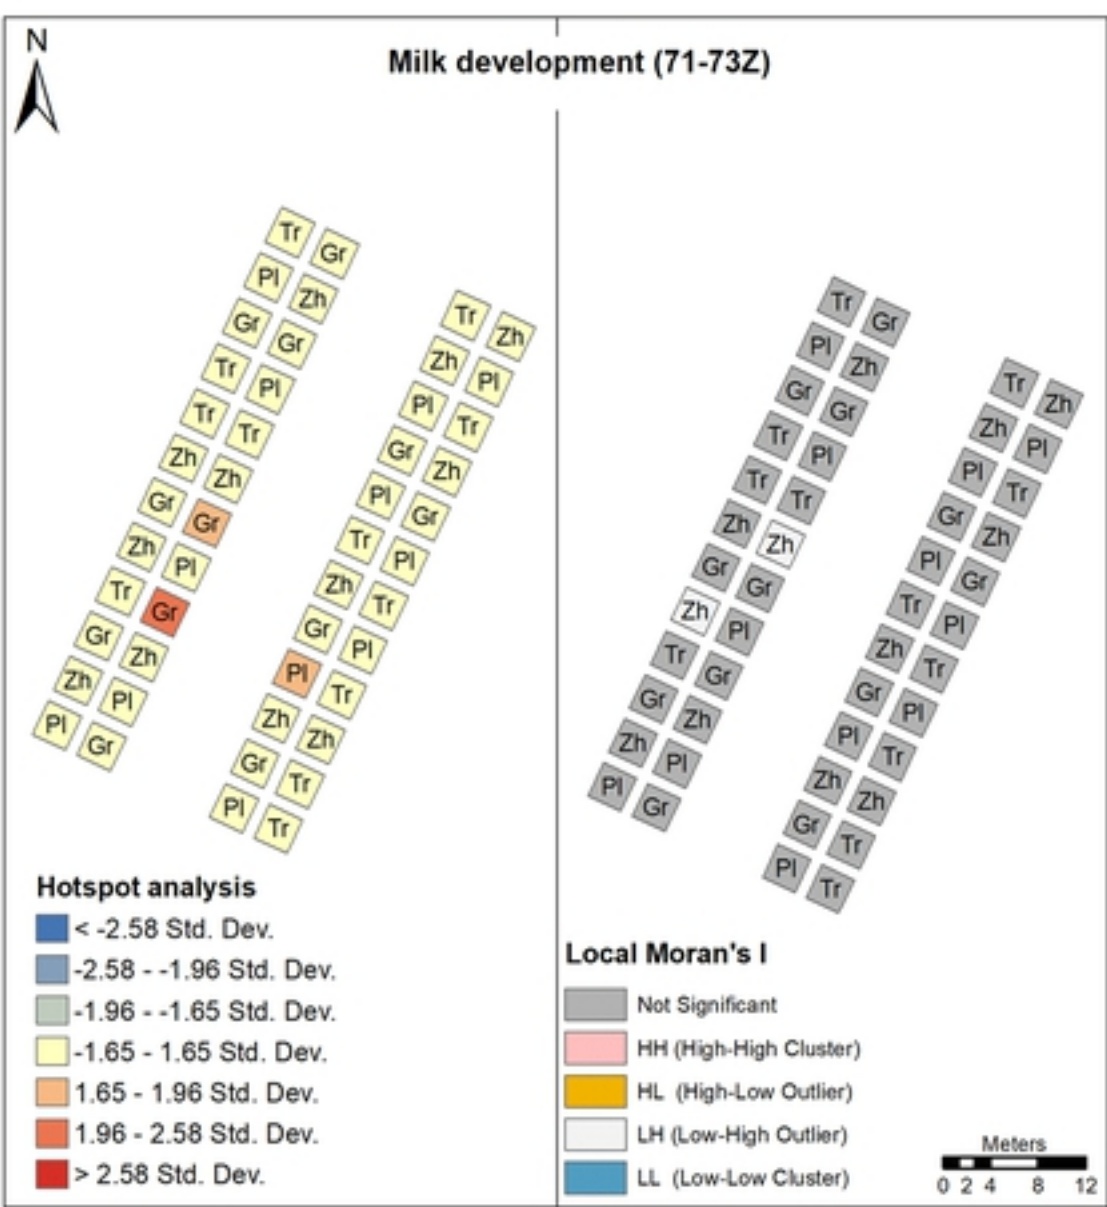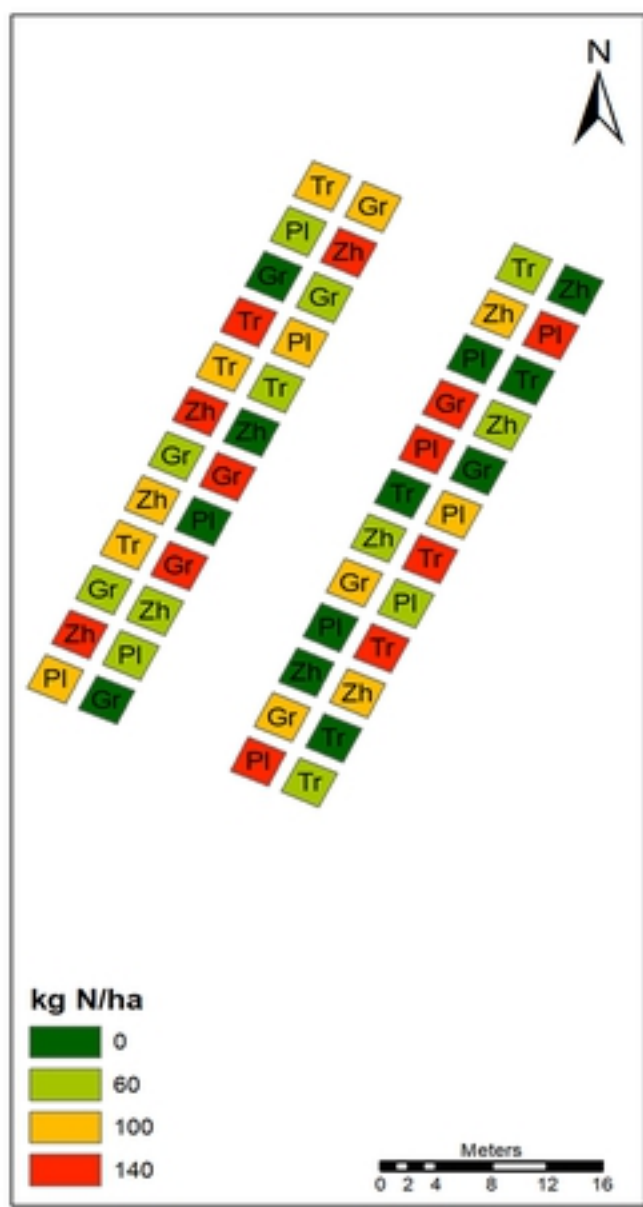

bioRxiv preprint doi: <https://doi.org/10.1101/649475>; this version posted May 26, 2019. The copyright holder for this preprint (which was not certified by peer review) is the author/funder, who has granted bioRxiv a license to display the preprint in perpetuity. It is made available under aCC-BY 4.0 International license.

Figure

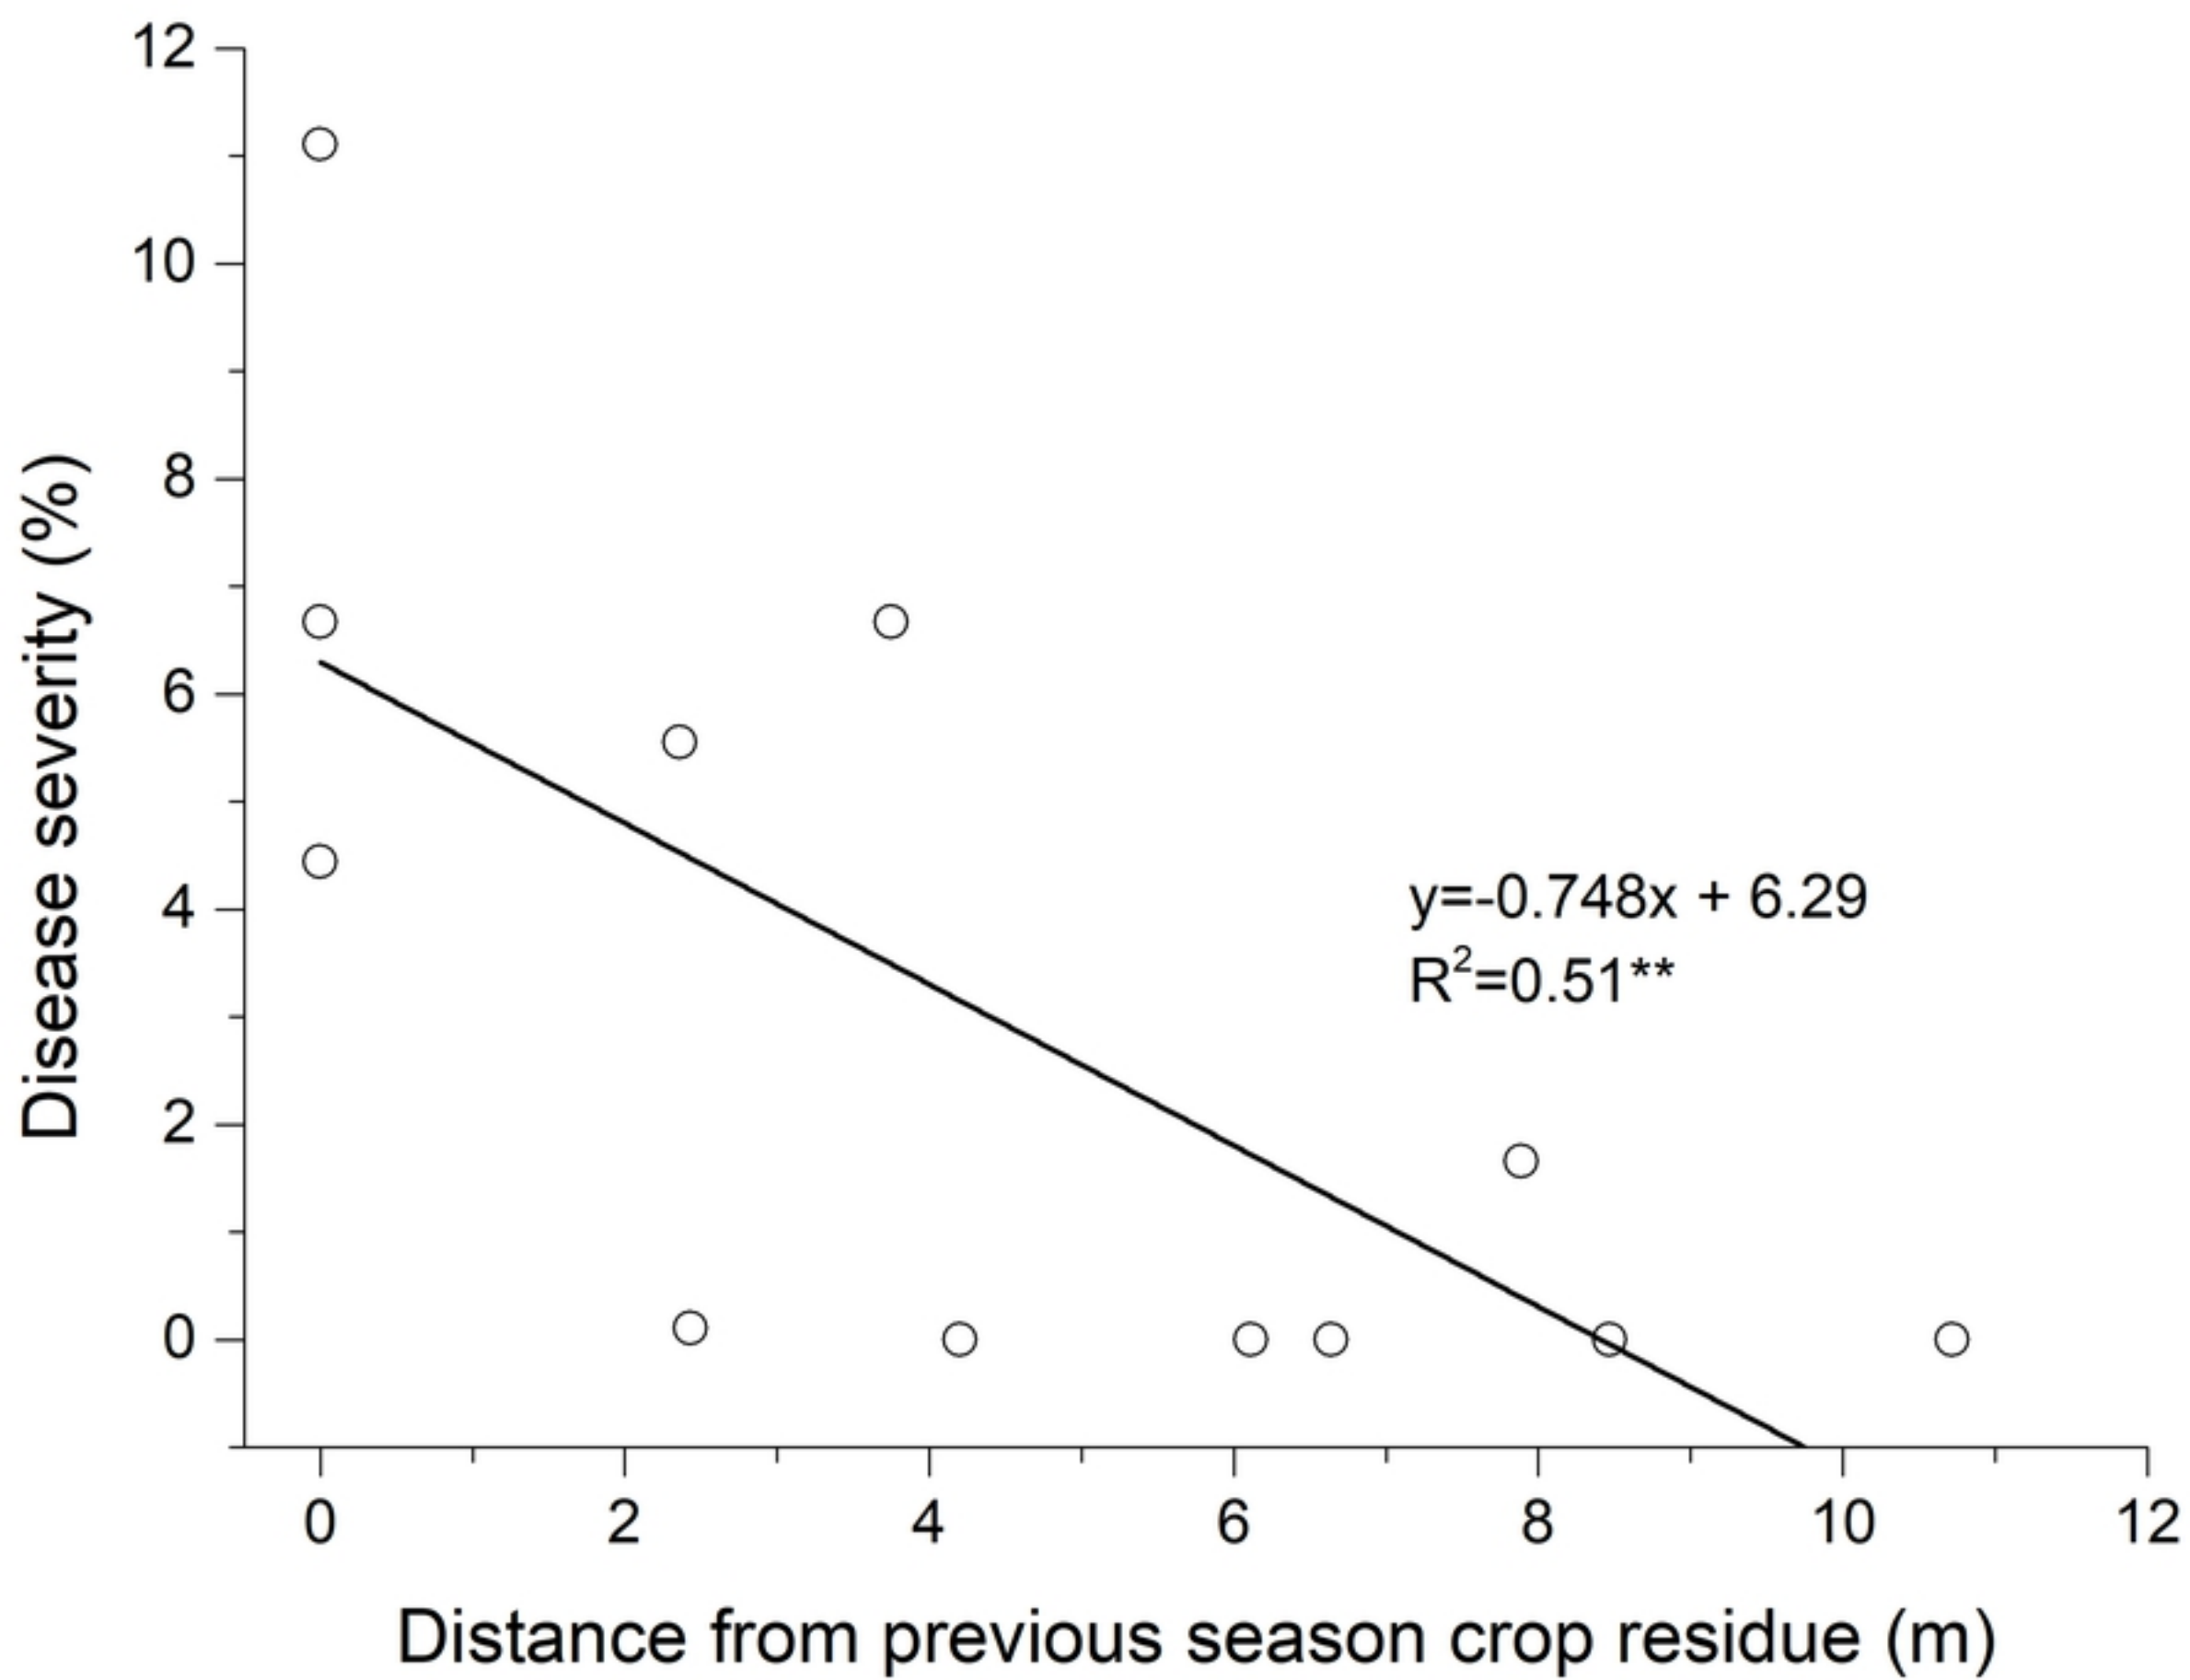

Figure

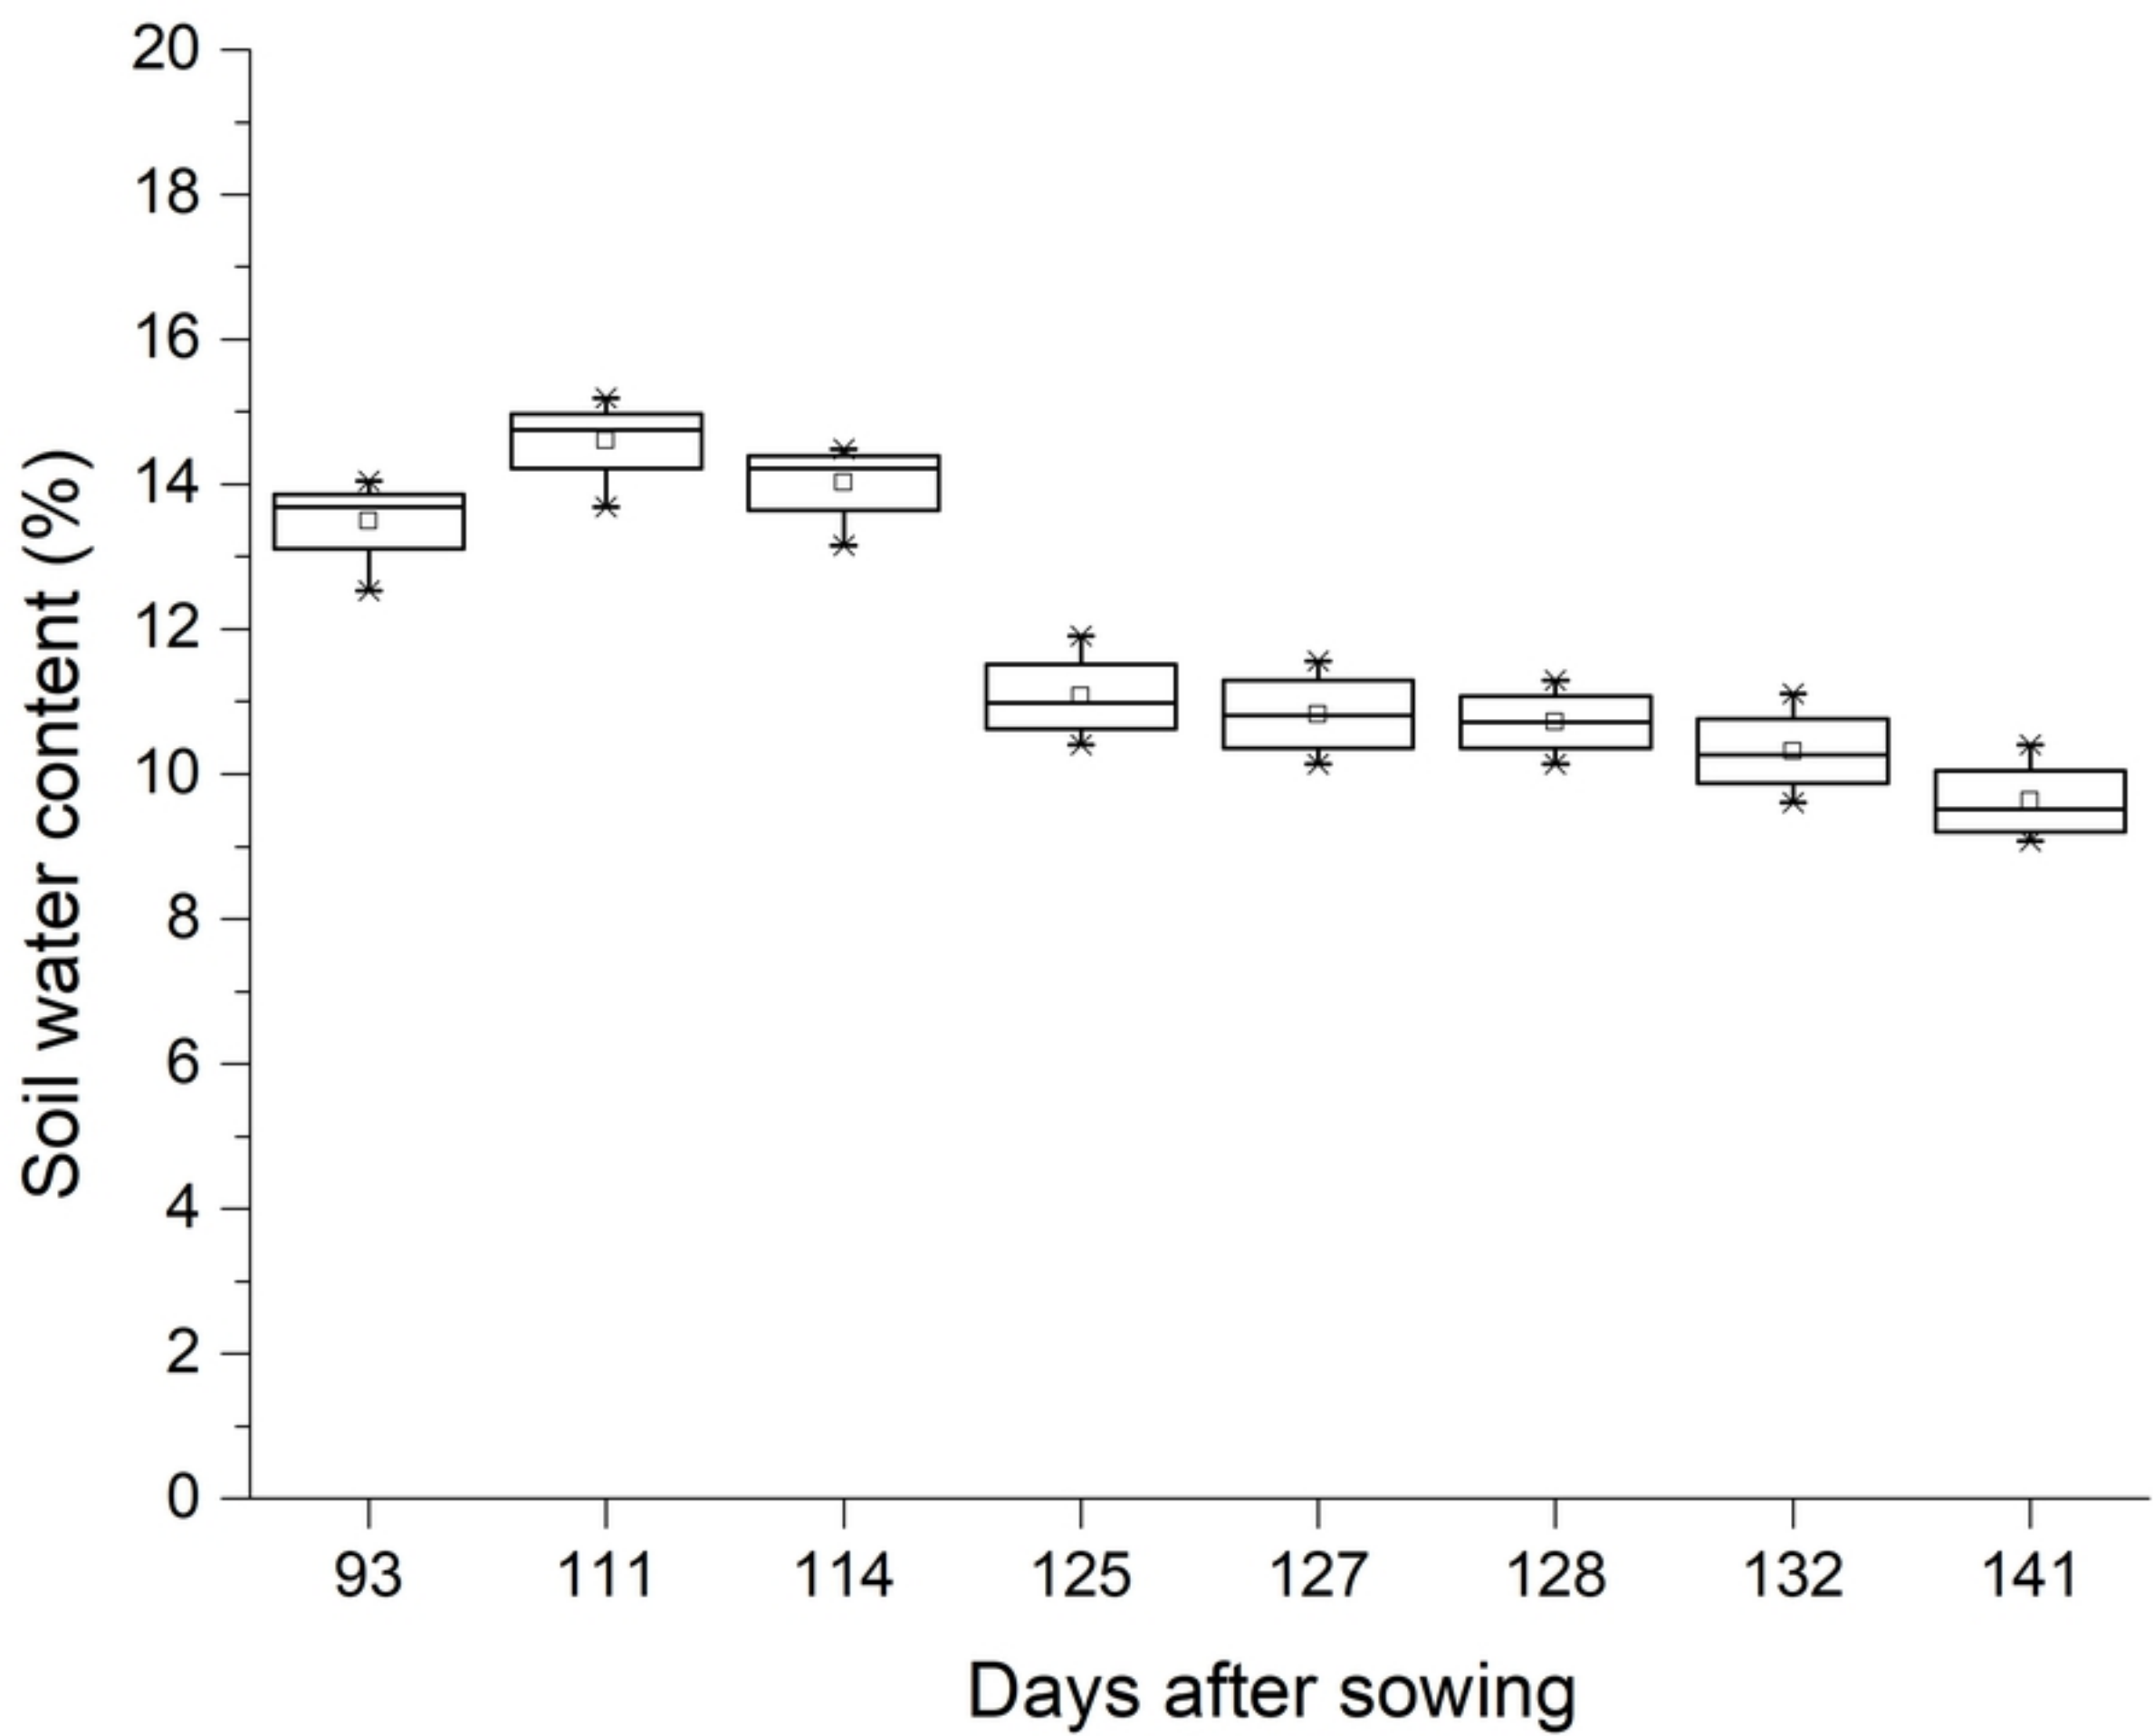

Figure
